# Supplementary material
Source: PubMed Central journal article supplement (PMC6241076)
Supplement: 10680_2017_9426_MOESM1_ESM.pdf [file 10680_2017_9426_MOESM1_ESM.pdf]

**Figures from some of the most recent FGM/C prevalence studies in EU member states**

| <b>Country</b>    | <b><i>Estimated number of women affected by FGM/C or at risk</i></b>         |
|-------------------|------------------------------------------------------------------------------|
| United Kingdom    | Nearly 66,000 women with FGM/C                                               |
| France            | Nearly 53,000 adult women with FGM/C                                         |
| Italy             | 57,000 foreign girls and women aged 15-49                                    |
| Belgium           | 13,112 women with FGM/C and 4,084 at risk                                    |
| Hungary           | Between 170 and 350 women affected by FGM/C                                  |
| Nederland         | 29,120 women with FGM/C                                                      |
| England and Wales | 137,000 women and girls with FGM/C and nearly 10,000 girls aged 0-14 at risk |
| Germany           | 35,715 women with FGM/C and 5,956 women at risk                              |

| <i>Year of reference for the estimation</i> | <i>Source</i>                |
|---------------------------------------------|------------------------------|
| 2001                                        | Dorkenoo et al. 2007         |
| 2004                                        | Andro et al. 2009            |
| 2010                                        | Farina et al. 2016           |
| 2012                                        | Dubourg and Richard 2014     |
| 2012                                        | Köszeghy 2012                |
| 2012                                        | Exterkate 2013               |
| 2011                                        | Macfarlane and Dorkenoo 2014 |
| 2015                                        | Terre des Femmes 2015        |

**Table 2. Sources of data about FGM/C in practicing countries used for this study, year of the survey and estimated**

| Country                  | Source | Year      | Prevalence among women 15-49 |
|--------------------------|--------|-----------|------------------------------|
| Benin                    | DHS    | 2011-12   | 7.3                          |
| Burkina Faso             | DHS    | 2010      | 75.8                         |
| Cameroon                 | DHS    | 2004      | 1.4                          |
| Central African Republic | MICS   | 2010      | 24.2                         |
| Chad                     | DHS    | 2010      | 44.2                         |
| Djibouti                 | MICS   | 2007      | 93.1                         |
| Egypt                    | DHS    | 2014      | 92.3                         |
| Eritrea                  | PHS    | 2010      | 83.0                         |
| Ethiopia                 | DHS    | 2010      | 74.3                         |
| Gambia                   | DHS    | 2013      | 74.9                         |
| Ghana                    | MICS   | 2011      | 3.8                          |
| Guinea                   | MICS   | 2012      | 96.9                         |
| Guinea Bissau            | MICS   | 2010      | 49.8                         |
| Iraq                     | MICS   | 2011      | 8.1                          |
| Ivory Coast              | DHS    | 2011-2012 | 38.2                         |
| Kenya                    | DHS    | 2014      | 21.0                         |
| Liberia                  | DHS    | 2013      | 49.8                         |
| Mali                     | DHS    | 2012-2013 | 91.4                         |
| Mauritania               | MICS   | 2011      | 69.4                         |
| Niger                    | DHS    | 2012      | 2.0                          |
| Nigeria                  | DHS    | 2013      | 24.8                         |
| Senegal                  | DHS    | 2012-2014 | 24.7                         |
| Sierra Leone             | DHS    | 2013      | 89.6                         |
| Somalia                  | MICS   | 2006      | 97.9                         |
| Sudan                    | HHS    | 2010      | 87.6                         |
| Tanzania                 | DHS    | 2010      | 14.6                         |
| Togo                     | DHS    | 2013-2014 | 4.7                          |
| Uganda                   | MICS   | 2011      | 1.4                          |
| Yemen                    | DHS    | 2013      | 18.5                         |

Source: DHS, MICS, PHS and HHS surveys, for details see the end of the Reference section.

l prevalence among women aged 15-49

**Additional Reference:**

Andro, A., Lesclingand, M., Cambois, E., & Cirbeau, C. (2009). Excision et Handicap (ExH): Mesure des lésions et traumatismes et handicaps associés. *Journal of Population Research*, 26(1), 1-14.

Dorkenoo, E., Morison, L., & Macfarlane, A. (2007). A statistical study to estimate the prevalence of female genital mutilation in Flanders. *Journal of Population Research*, 24(1), 1-14.

Dubourg, D., & Richard, F. (2014). Studie over de prevalentie van en het risico op vrouwelijke genitale verminking in België. *Brussels Journal of Statistics*, 43(1), 1-14.

Exterkate, M. (2013). Female Genital Mutilation in the Netherlands. Prevalence, incidence and determinants. Utrecht: Pharos.

Farina, P., Ortensi, L. E., & Menonna, A. (2016). Estimating the number of foreign women with female genital mutilation/cutting in Italy. *Journal of Population Research*, 33(1), 1-14.

Köszeghy, L. (2012). FGM prevalence in Hungary-estimation. Internet Resource. <http://mona-alapitvany.hu/wp-content/uploads/2012/08/FGM-prevalence-in-Hungary-estimation.pdf>

Macfarlane, A., & Dorkenoo, E. (2014). Female genital mutilation in England & Wales: Updated statistical estimates of the affected women. *Journal of Population Research*, 31(1), 1-14.

Terre des Femmes (2015). Dunkelzifferstatistik zur weiblichen Genitalverstümmelung in Deutschland. Internet Resource. [http://www.terredesfemmes.org/fileadmin/user\\_upload/20150623\\_DZF\\_2014.pdf](http://www.terredesfemmes.org/fileadmin/user_upload/20150623_DZF_2014.pdf)

**DHS/MICS/PHS surveys**

[Benin] Institut National de la Statistique et de l'Analyse Économique (INSAE) et ICF International (2013). *Enquête Démographique et de Santé (EDS) 2011*. ICF International, Rockville, MD, USA.

[Burkina Faso] Institut National de la Statistique et de la Démographie (INSD) et ICF International (2012). *Enquête Démographique et de Santé (EDS) 2010*. ICF International, Rockville, MD, USA.

[Cameroon] Institut National de la Statistique (INS) et ORC Macro. 2004. *Enquête Démographique et de Santé du Cameroun 2004*. ICF International, Rockville, MD, USA.

[Central African Republic] ICASEES (2010). *Enquête par grappes à indicateurs multiples MICS - MICS couplée avec la sérologie VIH*. ICF International, Rockville, MD, USA.

[Chad] Unicef. *Enquête par grappes à indicateurs multiples TCHAD 2010*. N'Djaména: Unicef.

[Djibouti] Unicef (2006) *Enquête Djiboutienne à Indicateurs Multiple (EDIM 2006)*. Djibouti: Unicef.

[Egypt] Ministry of Health and Population [Egypt], El-Zanaty and Associates and ICF International (2015). *Egypt Demographic and Health Survey 2014*. ICF International, Rockville, MD, USA.

[Eritrea] National Statistics Office (NSO) and Fafo AIS (2013). *Eritrea Population and Health Survey 2010*. Asmara, Eritrea: National Statistics Office (NSO) and Fafo AIS.

[Ethiopia] Central Statistical Agency and ORC Macro (2006). *Ethiopia Demographic and Health Survey 2005*. Addis Ababa, Ethiopia: Central Statistical Agency and ORC Macro.

[Ghana] Ghana Statistical Service, 2011. *Ghana Multiple Indicator Cluster Survey with an Enhanced Malaria Module and Biomarker*. Accra, Ghana: Ghana Statistical Service.

[Guinea Bissau] Ministério da Economia, do Plano e Integração Regional – Direcção Geral do Plano, 2011 *Inquérito aos Indicadores de Desenvolvimento Humano*. Bissau, Guinea Bissau: Direcção Geral do Plano.

[Guinea] Institut National de la Statistique Ministère du Plan Conakry, Guinée (2012) *Enquête Démographique et de Santé et à Indicateurs Multiples (EDSM) 2010*. Conakry, Guinée: Institut National de la Statistique.

[Iraq] The Central Statistics Organization and the Kurdistan Regional Statistics Office (2012) *Iraq Multiple Indicators Cluster Survey 2011*. Baghdad, Iraq: The Central Statistics Organization and the Kurdistan Regional Statistics Office.

[Ivory Coast] Institut National de la Statistique (INS) et ICF International (2012). *Enquête Démographique et de Santé et à Indicateurs Multiples (EDSM) 2011*. ICF International, Rockville, MD, USA.

[Kenia] Kenya National Bureau of Statistics (KNBS) and ICF International. 2014. *Kenya Demographic and Health Survey 2014*. Calverton, Maryland, USA: ICF International.

[Liberia] Liberia Institute of Statistics and Geo-Information Services (LISGIS), Ministry of Health and Social Welfare, National Aids Commission (2013). *Liberia Demographic and Health Survey 2013*. Monrovia, Liberia: LISGIS, Ministry of Health and Social Welfare, National Aids Commission.

[Mali] Cellule de Planification et de Statistiques (CPS/SSDSPF), Institut National de la Statistique (INSTAT), Centre d'Études et de Recherches Démographiques (CERD) (2012). *Mali Demographic and Health Survey 2012*. Bamako, Mali: Cellule de Planification et de Statistiques (CPS/SSDSPF), Institut National de la Statistique (INSTAT), Centre d'Études et de Recherches Démographiques (CERD).

[Mauritania] Unicef and Office National de la Statistique (ONS) (2014) *L'enquête par grappes à indicateurs multiples de la Mauritanie 2013*. Nouakchott, Mauritania: Unicef and Office National de la Statistique (ONS).

[Niger] Institut National de la Statistique (INS) et ICF International, 2013. *Enquête Démographique et de Santé et à Indicateurs Multiples (EDSM) 2010*. Niamey, Niger: Institut National de la Statistique (INS) et ICF International.

[Nigeria] National Population Commission (NPC) and ICF International (2014). *Nigeria Demographic and Health Survey 2013*. Abuja, Nigeria: National Population Commission (NPC) and ICF International.

[Sénégal] Agence Nationale de la Statistique et de la Démographie (ANSD) et ICF International. 2015. *Sénégal : Enquête Démographique et de Santé (EDSM) 2014*. Dakar, Sénégal: Agence Nationale de la Statistique et de la Démographie (ANSD) et ICF International.

[Sierra Leone] Statistics Sierra Leone (SSL) and ICF International. 2014. *Sierra Leone Demographic and Health Survey 2013*. Freetown, Sierra Leone: Statistics Sierra Leone (SSL) and ICF International.

[Somalia] Unicef (2006) *Somalia Multiple Indicators Cluster Survey*. MICS Report Online Resource. [http://www.dhs.org/pubs/mics/mics2006/mics2006\\_rpt.pdf](http://www.dhs.org/pubs/mics/mics2006/mics2006_rpt.pdf)

[Sudan] Federal Ministry of Health and Central Bureau of Statistics, Sudan Household and Health Survey -2, 2012. *National report on the Sudan Household and Health Survey -2, 2012*. Khartoum, Sudan: Federal Ministry of Health and Central Bureau of Statistics.

[Tanzania] National Bureau of Statistics (NBS) and ICF Macro. (2011) *Tanzania Demographic and Health Survey 2010*. Dar es Salaam, Tanzania: National Bureau of Statistics (NBS) and ICF Macro.

[The Gambia] Bureau of Statistics (GBOS) and ICF International. 2014. *The Gambia Demographic and Health Survey 2013*. Banjul, Gambia: Bureau of Statistics (GBOS) and ICF International.

[Togo] Ministère de la Planification, du Développement et de l'Aménagement du Territoire (MPDAT), Ministère de la Santé (MS) (2013). *Togo Demographic and Health Survey 2013*. Lomé, Togo: Ministère de la Planification, du Développement et de l'Aménagement du Territoire (MPDAT), Ministère de la Santé (MS).

[Uganda] Uganda Bureau of Statistics (UBOS) and ICF International Inc. 2012. *Uganda Demographic and Health Survey 2011*. Kampala, Uganda: Uganda Bureau of Statistics (UBOS) and ICF International Inc.

[Yemen] Ministry of Public Health and Population (MOPHP), Central Statistical Organization (CSO) [Yemen], Pan Arab Program of Health (EDSM V) 2012-2013. ICF International Rockville, Maryland, USA.

et évaluation des besoins en chirurgie réparatrice. Paris: INED.  
England & Wales: summary report. London (UK): Forward.  
FOD Volksgezondheid.

Italy. European Journal of Public Health First published online: 22 March 2016. DOI: <http://dx.doi.org/10.1093/ejpub/ckw012/11/fgm-prevalence-in-hungary-estimation.pdf>. Accessed 18 February 2016.  
women living in England and Wales and girls at risk. Interim report on provisional estimates. London: City University of London. [www.frauenrechte.de/online/index.php/themen-und-aktionen/weibliche-genitalverstuemmelung2/aktuelles](http://www.frauenrechte.de/online/index.php/themen-und-aktionen/weibliche-genitalverstuemmelung2/aktuelles). Accessed 18 February 2016.

*Enquête de Santé du Bénin 2011-2012*. Calverton, Maryland, USA : INSAE et ICF International.  
*Enquête de Santé et à Indicateurs Multiples du Burkina Faso 2010*. Calverton, Maryland, USA : INSD et ICF International.  
*VIH, RCA 2010 Rapport final*. Bangui, RCA ICASEES.

*Demographic and Health Survey 2014*. Cairo, Egypt and Rockville, Maryland, USA: National Statistics Office and Fao Institute for Applied International Studies.  
*Demographic and Health Survey 2011*. Calverton, Maryland, USA: Central Statistical Agency and ORC Macro.  
*Demographic and Health Survey 2011*, Final Report. Accra, Ghana.  
*Enquête Démographique et de Santé Multiples, Inquérito Demográfico de Saúde Reprodutiva - Guiné-Bissau, 2011, Relatório Final*. Calverton, Maryland, USA: ICF International.  
*Enquête Démographique et de Santé Multiples (EDS-MICS) 2012 MEASURE DHS*, ICF International Calverton, Maryland, U.S.A.  
*Demographic and Health Survey 2011* Final Report Baghdad, Iraq: The Central Statistics Organization and the Kurdistan Regional Statistics Office.  
*Enquête Démographique et de Santé Multiples de Côte d'Ivoire 2011-2012*. Calverton, Maryland, USA : INS et ICF International.  
*Demographic and Health Survey 2011*. Calverton, Maryland, USA: KNBS et ICF International.  
*Demographic and Health Survey 2013*. Liberia Demographic and Health Survey 2013. Monrovia, Liberia: National Bureau of Statistics (INFO-STAT), Enquête Démographique et de Santé Multiples (MICS 2011).  
*Enquête Démographique et de Santé Multiples du Niger 2012*. Calverton, Maryland, USA : INS et ICF International.  
*Demographic and Health Survey 2011*. Abuja, Nigeria, and Rockville, Maryland, USA: NPC and ICF International.  
*Enquête Démographique et de Santé Continue (EDS-Continue 2012-14), Rapport Régional*. Rockville, Maryland, USA : ANSD et ICF International.

*Demographic and Health Survey 2011*. Khartoum, Republic of Sudan: Federal Ministry of Health and Central Bureau of Statistics.  
*Demographic and Health Survey 2011*. Dar es Salaam, Tanzania, NBS and ICF Macro.  
*Demographic and Health Survey 2011*. Banjul, The Gambia, and Rockville, Maryland, USA: GBOS and ICF International.  
*Enquête Démographique et de Santé au Togo 2013-2014*. Rockville, Maryland, USA: ICF International.  
*Demographic and Health Survey 2011*. Kampala, Uganda: UBOS and Calverton, Maryland: ICF International Inc. Planification, du Développement et de l'Action Sociale (PAPFAM), and ICF International. 2015.  
*Yemen National Health and Demographic Survey 2011*. Sana'a, Yemen: ICF International.

urpub/ckw015

rsitry London & Equality Now.

.8 February 2016.

nal

e  
de Santé à Indicateurs Multiples au Sénégal (EDS-MICS) 2010-2011. Calverton, Maryland, USA: ANSD et ICF In-

ria: Liberia Institute of Statistics and Geo-

CF International.

aménagement du Territoire Enquête par grappes à indicateurs multiples.

3. Rockville, Maryland, USA: MOPHP, CSO, PAFAM, and ICF International.

ternational



| <i>Unicef classification</i>                  | 4          | 2            | 5          | 4                        | 3          | 3           |
|-----------------------------------------------|------------|--------------|------------|--------------------------|------------|-------------|
| Flows of women with FGM/C Baseline hypothesis | Benin      | Burkina Faso | Cameroon   | Central African Republic | Chad       | Ivory Coast |
| Belgium                                       | 17         | 218          | 30         | 11                       | 19         | 317         |
| Bulgaria                                      | 0          | 0            | 0          | 0                        | 0          | 0           |
| Czech Republic                                | 1          | 4            | 0          | 0                        | 2          | 7           |
| Denmark                                       | 1          | 10           | 2          | 1                        | 3          | 17          |
| Germany                                       | 24         | 307          | 53         | 7                        | 26         | 344         |
| Estonia                                       | 0          | 0            | 0          | 0                        | 0          | 0           |
| Ireland                                       | 0          | 0            | 1          | 0                        | 1          | 6           |
| Greece                                        | 0          | 2            | 0          | 0                        | 0          | 2           |
| Spain                                         | 9          | 225          | 14         | 7                        | 9          | 217         |
| France                                        | 155        | 737          | 137        | 500                      | 489        | 4356        |
| Italy                                         | 40         | 2169         | 19         | 5                        | 16         | 1257        |
| Cyprus                                        | 0          | 0            | 0          | 0                        | 0          | 0           |
| Latvia                                        | 0          | 0            | 0          | 0                        | 0          | 0           |
| Lithuania                                     | 0          | 0            | 0          | 0                        | 0          | 0           |
| Luxembourg                                    | 1          | 5            | 1          | 1                        | 1          | 14          |
| Hungary                                       | 0          | 0            | 0          | 0                        | 0          | 1           |
| Malta                                         | 0          | 0            | 0          | 0                        | 0          | 0           |
| Netherlands                                   | 3          | 52           | 4          | 1                        | 4          | 35          |
| Austria                                       | 1          | 29           | 2          | 1                        | 2          | 18          |
| Poland                                        | 0          | 0            | 0          | 0                        | 0          | 0           |
| Portugal                                      | 0          | 4            | 0          | 0                        | 3          | 0           |
| Romania                                       | 0          | 0            | 0          | 0                        | 0          | 0           |
| Slovenia                                      | 0          | 0            | 0          | 0                        | 2          | 0           |
| Slovakia                                      | 0          | 0            | 0          | 0                        | 1          | 0           |
| Finland                                       | 0          | 0            | 1          | 0                        | 0          | 4           |
| Sweden                                        | 1          | 10           | 4          | 3                        | 4          | 39          |
| United Kingdom                                | 0          | 0            | 0          | 0                        | 0          | 0           |
| Croatia                                       | 0          | 0            | 0          | 0                        | 0          | 0           |
| <b>Total</b>                                  | <b>254</b> | <b>3772</b>  | <b>268</b> | <b>537</b>               | <b>580</b> | <b>6637</b> |

| <i>Unicef classification</i>                   | 4     | 2            | 5        | 4                        | 3    | 3           |
|------------------------------------------------|-------|--------------|----------|--------------------------|------|-------------|
| Flows of women with FGM/C Selection hypothesis | Benin | Burkina Faso | Cameroon | Central African Republic | Chad | Ivory Coast |
| Belgium                                        | 7     | 205          | 14       | 7                        | 12   | 216         |
| Bulgaria                                       | 0     | 0            | 0        | 0                        | 0    | 0           |
| Czech Republic                                 | 0     | 4            | 0        | 0                        | 1    | 5           |
| Denmark                                        | 0     | 9            | 1        | 0                        | 2    | 12          |
| Germany                                        | 10    | 288          | 25       | 4                        | 16   | 235         |
| Estonia                                        | 0     | 0            | 0        | 0                        | 0    | 0           |
| Ireland                                        | 0     | 0            | 0        | 0                        | 1    | 4           |
| Greece                                         | 0     | 2            | 0        | 0                        | 0    | 1           |
| Spain                                          | 4     | 211          | 7        | 4                        | 6    | 148         |
| France                                         | 67    | 691          | 65       | 312                      | 305  | 2972        |
| Italy                                          | 17    | 2035         | 9        | 3                        | 10   | 858         |
| Cyprus                                         | 0     | 0            | 0        | 0                        | 0    | 0           |
| Latvia                                         | 0     | 0            | 0        | 0                        | 0    | 0           |
| Lithuania                                      | 0     | 0            | 0        | 0                        | 0    | 0           |
| Luxembourg                                     | 0     | 5            | 1        | 0                        | 0    | 10          |
| Hungary                                        | 0     | 0            | 0        | 0                        | 0    | 1           |
| Malta                                          | 0     | 0            | 0        | 0                        | 0    | 0           |
| Netherlands                                    | 1     | 48           | 2        | 0                        | 2    | 24          |
| Austria                                        | 1     | 27           | 1        | 1                        | 1    | 12          |
| Poland                                         | 0     | 0            | 0        | 0                        | 0    | 0           |
| Portugal                                       | 0     | 4            | 0        | 0                        | 2    | 0           |
| Romania                                        | 0     | 0            | 0        | 0                        | 0    | 0           |
| Slovenia                                       | 0     | 0            | 0        | 0                        | 2    | 0           |
| Slovakia                                       | 0     | 0            | 0        | 0                        | 0    | 0           |

|                |            |             |            |            |            |             |
|----------------|------------|-------------|------------|------------|------------|-------------|
| Finland        | 0          | 0           | 1          | 0          | 0          | 3           |
| Sweden         | 0          | 9           | 2          | 2          | 3          | 27          |
| United Kingdom | 0          | 0           | 0          | 0          | 0          | 0           |
| Croatia        | 0          | 0           | 0          | 0          | 0          | 0           |
| <b>Total</b>   | <b>109</b> | <b>3539</b> | <b>128</b> | <b>335</b> | <b>362</b> | <b>4528</b> |

| 1          | 1            | 1           | 2           | 2           | 5           | 1            | 3             |
|------------|--------------|-------------|-------------|-------------|-------------|--------------|---------------|
| Djibouti   | Egypt        | Eritrea     | Ethiopia    | Gambia      | Ghana       | Guinea       | Guinea-Bissau |
| 137        | 301          | 95          | 262         | 127         | 38          | 2363         | 8             |
| 0          | 0            | 0           | 0           | 0           | 0           | 0            | 0             |
| 1          | 43           | 2           | 21          | 3           | 1           | 25           | 3             |
| 1          | 52           | 43          | 110         | 55          | 11          | 10           | 4             |
| 11         | 1932         | 1078        | 1540        | 536         | 130         | 941          | 64            |
| 0          | 1            | 0           | 0           | 0           | 0           | 0            | 0             |
| 0          | 69           | 11          | 28          | 0           | 3           | 16           | 0             |
| 0          | 1178         | 64          | 537         | 5           | 3           | 3            | 1             |
| 2          | 389          | 30          | 316         | 3645        | 173         | 3469         | 918           |
| 76         | 1077         | 92          | 173         | 461         | 11          | 3613         | 76            |
| 10         | 6587         | 1930        | 1573        | 136         | 235         | 591          | 44            |
| 0          | 61           | 0           | 20          | 3           | 1           | 0            | 0             |
| 0          | 1            | 0           | 0           | 0           | 0           | 0            | 0             |
| 0          | 2            | 1           | 1           | 0           | 0           | 1            | 0             |
| 1          | 4            | 2           | 22          | 25          | 0           | 42           | 10            |
| 0          | 53           | 2           | 12          | 1           | 1           | 5            | 0             |
| 0          | 4            | 41          | 14          | 0           | 0           | 0            | 0             |
| 3          | 378          | 80          | 475         | 95          | 44          | 135          | 7             |
| 0          | 661          | 21          | 212         | 375         | 15          | 179          | 29            |
| 0          | 7            | 2           | 8           | 0           | 0           | 3            | 0             |
| 4          | 54           | 0           | 24          | 15          | 0           | 0            | 0             |
| 0          | 0            | 0           | 0           | 0           | 0           | 0            | 0             |
| 0          | 5            | 0           | 0           | 2           | 0           | 3            | 0             |
| 0          | 9            | 0           | 3           | 0           | 0           | 1            | 0             |
| 1          | 32           | 24          | 110         | 49          | 5           | 10           | 0             |
| 9          | 213          | 1740        | 790         | 421         | 12          | 59           | 5             |
| 86         | 475          | 29          | 1869        | 1627        | 359         | 0            | 0             |
| 0          | 0            | 0           | 0           | 0           | 0           | 0            | 0             |
| <b>341</b> | <b>13586</b> | <b>5288</b> | <b>8122</b> | <b>7581</b> | <b>1043</b> | <b>11468</b> | <b>1172</b>   |

| 1        | 1     | 1       | 2        | 2      | 5     | 1      | 3             |
|----------|-------|---------|----------|--------|-------|--------|---------------|
| Djibouti | Egypt | Eritrea | Ethiopia | Gambia | Ghana | Guinea | Guinea-Bissau |
| 135      | 282   | 87      | 239      | 122    | 15    | 2291   | 6             |
| 0        | 0     | 0       | 0        | 0      | 0     | 0      | 0             |
| 1        | 40    | 1       | 19       | 3      | 1     | 24     | 2             |
| 1        | 49    | 39      | 100      | 52     | 4     | 10     | 3             |
| 11       | 1813  | 987     | 1403     | 513    | 51    | 913    | 47            |
| 0        | 1     | 0       | 0        | 0      | 0     | 0      | 0             |
| 0        | 64    | 10      | 26       | 0      | 1     | 15     | 0             |
| 0        | 1106  | 59      | 489      | 5      | 1     | 3      | 1             |
| 2        | 365   | 28      | 288      | 3488   | 68    | 3363   | 673           |
| 75       | 1011  | 84      | 158      | 441    | 4     | 3503   | 56            |
| 10       | 6182  | 1767    | 1433     | 130    | 93    | 573    | 32            |
| 0        | 57    | 0       | 18       | 3      | 0     | 0      | 0             |
| 0        | 1     | 0       | 0        | 0      | 0     | 0      | 0             |
| 0        | 2     | 1       | 1        | 0      | 0     | 1      | 0             |
| 1        | 4     | 2       | 20       | 24     | 0     | 41     | 8             |
| 0        | 50    | 2       | 11       | 1      | 0     | 5      | 0             |
| 0        | 4     | 37      | 13       | 0      | 0     | 0      | 0             |
| 3        | 355   | 74      | 433      | 91     | 17    | 131    | 5             |
| 0        | 620   | 19      | 193      | 359    | 6     | 174    | 22            |
| 0        | 6     | 2       | 7        | 0      | 0     | 3      | 0             |
| 3        | 51    | 0       | 21       | 14     | 0     | 0      | 0             |
| 0        | 0     | 0       | 0        | 0      | 0     | 0      | 0             |
| 0        | 5     | 0       | 0        | 1      | 0     | 3      | 0             |
| 0        | 8     | 0       | 3        | 0      | 0     | 1      | 0             |

|            |              |             |             |             |            |              |            |
|------------|--------------|-------------|-------------|-------------|------------|--------------|------------|
| 1          | 30           | 22          | 100         | 46          | 2          | 10           | 0          |
| 8          | 200          | 1593        | 720         | 403         | 5          | 57           | 4          |
| 85         | 446          | 26          | 1703        | 1556        | 142        | 0            | 0          |
| 0          | 0            | 0           | 0           | 0           | 0          | 0            | 0          |
| <b>337</b> | <b>12751</b> | <b>4842</b> | <b>7400</b> | <b>7253</b> | <b>412</b> | <b>11118</b> | <b>859</b> |

| 5           | 3           | 2           | 1            | 2           | 5         | 3            | 3            |
|-------------|-------------|-------------|--------------|-------------|-----------|--------------|--------------|
| Iraq        | Kenya       | Liberia     | Mali         | Mauritania  | Niger     | Nigeria      | Senegal      |
| 103         | 69          | 43          | 170          | 127         | 8         | 333          | 211          |
| 0           | 0           | 0           | 0            | 0           | 0         | 0            | 0            |
| 7           | 5           | 2           | 9            | 1           | 0         | 32           | 3            |
| 74          | 38          | 13          | 2            | 2           | 0         | 56           | 4            |
| 670         | 711         | 660         | 151          | 70          | 3         | 1388         | 120          |
| 0           | 0           | 0           | 0            | 0           | 0         | 0            | 0            |
| 8           | 19          | 19          | 2            | 9           | 0         | 316          | 0            |
| 23          | 35          | 3           | 0            | 0           | 0         | 260          | 2            |
| 13          | 62          | 87          | 4596         | 1336        | 1         | 2658         | 3025         |
| 0           | 9           | 0           | 7644         | 1210        | 32        | 95           | 3311         |
| 22          | 89          | 380         | 247          | 49          | 3         | 1997         | 3357         |
| 0           | 3           | 0           | 0            | 0           | 0         | 4            | 0            |
| 0           | 0           | 0           | 0            | 0           | 0         | 0            | 0            |
| 0           | 0           | 0           | 0            | 0           | 0         | 2            | 0            |
| 3           | 1           | 24          | 3            | 1           | 0         | 37           | 11           |
| 1           | 5           | 0           | 1            | 0           | 0         | 81           | 1            |
| 1           | 0           | 0           | 16           | 0           | 0         | 1            | 0            |
| 67          | 72          | 39          | 18           | 4           | 1         | 251          | 27           |
| 42          | 61          | 118         | 35           | 7           | 0         | 852          | 27           |
| 1           | 4           | 0           | 0            | 0           | 0         | 4            | 1            |
| 3           | 8           | 0           | 0            | 0           | 0         | 10           | 0            |
| 1           | 0           | 0           | 0            | 0           | 0         | 0            | 0            |
| 0           | 1           | 0           | 1            | 0           | 0         | 3            | 0            |
| 2           | 1           | 0           | 1            | 0           | 0         | 3            | 1            |
| 46          | 41          | 10          | 0            | 0           | 0         | 48           | 4            |
| 1140        | 62          | 64          | 21           | 4           | 0         | 171          | 17           |
| 11          | 1274        | 19          | 0            | 43          | 0         | 4979         | 35           |
| 0           | 0           | 0           | 0            | 0           | 0         | 0            | 0            |
| <b>2238</b> | <b>2572</b> | <b>1482</b> | <b>12917</b> | <b>2863</b> | <b>49</b> | <b>13580</b> | <b>10157</b> |

| 5    | 3     | 2       | 1    | 2          | 5     | 3       | 3       |
|------|-------|---------|------|------------|-------|---------|---------|
| Iraq | Kenya | Liberia | Mali | Mauritania | Niger | Nigeria | Senegal |
| 82   | 42    | 29      | 171  | 95         | 5     | 414     | 172     |
| 0    | 0     | 0       | 0    | 0          | 0     | 0       | 0       |
| 5    | 3     | 1       | 9    | 1          | 0     | 40      | 2       |
| 58   | 23    | 9       | 2    | 1          | 0     | 69      | 4       |
| 529  | 429   | 448     | 152  | 52         | 2     | 1724    | 98      |
| 0    | 0     | 0       | 0    | 0          | 0     | 1       | 0       |
| 7    | 11    | 13      | 2    | 7          | 0     | 392     | 0       |
| 18   | 21    | 2       | 0    | 0          | 0     | 322     | 2       |
| 10   | 37    | 59      | 4617 | 999        | 1     | 3301    | 2461    |
| 0    | 5     | 0       | 7678 | 905        | 18    | 118     | 2694    |
| 17   | 54    | 258     | 248  | 37         | 1     | 2480    | 2732    |
| 0    | 2     | 0       | 0    | 0          | 0     | 5       | 0       |
| 0    | 0     | 0       | 0    | 0          | 0     | 0       | 0       |
| 0    | 0     | 0       | 0    | 0          | 0     | 3       | 0       |
| 2    | 1     | 16      | 3    | 1          | 0     | 46      | 9       |
| 1    | 3     | 0       | 1    | 0          | 0     | 101     | 1       |
| 1    | 0     | 0       | 16   | 0          | 0     | 1       | 0       |
| 53   | 43    | 27      | 18   | 3          | 0     | 312     | 22      |
| 33   | 37    | 80      | 35   | 5          | 0     | 1058    | 22      |
| 1    | 3     | 0       | 0    | 0          | 0     | 4       | 1       |
| 2    | 5     | 0       | 0    | 0          | 0     | 13      | 0       |
| 1    | 0     | 0       | 0    | 0          | 0     | 0       | 0       |
| 0    | 1     | 0       | 1    | 0          | 0     | 4       | 0       |
| 1    | 1     | 0       | 1    | 0          | 0     | 3       | 1       |

|             |             |             |              |             |           |              |             |
|-------------|-------------|-------------|--------------|-------------|-----------|--------------|-------------|
| 37          | 25          | 7           | 0            | 0           | 0         | 59           | 3           |
| 901         | 38          | 44          | 21           | 3           | 0         | 212          | 14          |
| 9           | 768         | 13          | 0            | 32          | 0         | 6183         | 28          |
| 0           | 0           | 0           | 0            | 0           | 0         | 0            | 0           |
| <b>1768</b> | <b>1551</b> | <b>1005</b> | <b>12975</b> | <b>2141</b> | <b>27</b> | <b>16866</b> | <b>8266</b> |

| <i>1</i>     | <i>1</i> | <i>1</i> | <i>4</i>                           | <i>5</i> | <i>5</i> | <i>4</i> | <i>2</i>  |        |
|--------------|----------|----------|------------------------------------|----------|----------|----------|-----------|--------|
| Sierra Leone | Somalia  | Sudan    | Tanzania,<br>United<br>Republic of | Togo     | Uganda   | Yemen    | Indonesia | Total  |
| 145          | 332      | 155      | 31                                 | 32       | 3        | 4        | 264       | 5976   |
| 0            | 0        | 0        | 0                                  | 0        | 0        | 0        | 0         | 0      |
| 4            | 11       | 10       | 2                                  | 0        | 0        | 9        | 28        | 234    |
| 31           | 804      | 95       | 16                                 | 1        | 3        | 1        | 85        | 1542   |
| 812          | 633      | 673      | 65                                 | 126      | 7        | 96       | 1468      | 14647  |
| 0            | 0        | 0        | 0                                  | 0        | 0        | 0        | 0         | 3      |
| 11           | 277      | 127      | 2                                  | 0        | 1        | 3        | 10        | 937    |
| 16           | 0        | 38       | 5                                  | 0        | 1        | 0        | 78        | 2258   |
| 282          | 73       | 64       | 11                                 | 7        | 0        | 2        | 103       | 21745  |
| 194          | 0        | 251      | 0                                  | 99       | 0        | 0        | 297       | 25097  |
| 281          | 1205     | 211      | 28                                 | 40       | 2        | 11       | 204       | 22739  |
| 0            | 0        | 2        | 0                                  | 0        | 0        | 0        | 17        | 112    |
| 0            | 1        | 0        | 0                                  | 0        | 0        | 0        | 0         | 2      |
| 0            | 9        | 1        | 0                                  | 0        | 0        | 0        | 0         | 17     |
| 24           | 18       | 6        | 0                                  | 2        | 0        | 0        | 6         | 265    |
| 2            | 0        | 8        | 1                                  | 0        | 0        | 5        | 19        | 200    |
| 0            | 325      | 0        | 0                                  | 0        | 0        | 0        | 0         | 402    |
| 178          | 100      | 123      | 43                                 | 5        | 5        | 5        | 1141      | 3393   |
| 290          | 390      | 114      | 6                                  | 2        | 2        | 2        | 114       | 3607   |
| 0            | 7        | 0        | 1                                  | 0        | 0        | 2        | 8         | 48     |
| 4            | 0        | 0        | 0                                  | 0        | 0        | 2        | 43        | 174    |
| 0            | 0        | 0        | 0                                  | 0        | 0        | 0        | 0         | 1      |
| 0            | 1        | 0        | 0                                  | 0        | 0        | 0        | 3         | 23     |
| 0            | 4        | 12       | 0                                  | 0        | 0        | 1        | 11        | 49     |
| 19           | 1291     | 113      | 12                                 | 0        | 1        | 1        | 30        | 1853   |
| 131          | 9124     | 171      | 29                                 | 1        | 5        | 20       | 94        | 14364  |
| 2102         | 2520     | 484      | 690                                | 2        | 71       | 58       | 811       | 17543  |
| 0            | 0        | 0        | 0                                  | 0        | 0        | 0        | 0         | 0      |
| 4526         | 17125    | 2657     | 943                                | 318      | 100      | 220      | 4835      | 137230 |

| <i>1</i>     | <i>1</i> | <i>1</i> | <i>4</i>                           | <i>5</i> | <i>5</i> | <i>4</i> | <i>2</i>  |       |
|--------------|----------|----------|------------------------------------|----------|----------|----------|-----------|-------|
| Sierra Leone | Somalia  | Sudan    | Tanzania,<br>United<br>Republic of | Togo     | Uganda   | Yemen    | Indonesia | Total |
| 127          | 327      | 143      | 12                                 | 13       | 3        | 3        | 265       | 5541  |
| 0            | 0        | 0        | 0                                  | 0        | 0        | 0        | 0         | 0     |
| 4            | 11       | 9        | 1                                  | 0        | 0        | 7        | 28        | 222   |
| 27           | 793      | 88       | 6                                  | 0        | 3        | 1        | 86        | 1452  |
| 709          | 624      | 620      | 26                                 | 52       | 8        | 74       | 1478      | 13341 |
| 0            | 0        | 0        | 0                                  | 0        | 0        | 0        | 0         | 3     |
| 9            | 273      | 117      | 1                                  | 0        | 1        | 3        | 10        | 966   |
| 14           | 0        | 35       | 2                                  | 0        | 1        | 0        | 79        | 2164  |
| 246          | 72       | 59       | 4                                  | 3        | 0        | 1        | 104       | 20631 |
| 169          | 0        | 231      | 0                                  | 41       | 0        | 0        | 299       | 21905 |
| 246          | 1188     | 195      | 11                                 | 17       | 2        | 8        | 206       | 20852 |
| 0            | 0        | 2        | 0                                  | 0        | 0        | 0        | 17        | 105   |
| 0            | 1        | 0        | 0                                  | 0        | 0        | 0        | 0         | 2     |
| 0            | 8        | 1        | 0                                  | 0        | 0        | 0        | 0         | 17    |
| 21           | 18       | 5        | 0                                  | 1        | 0        | 0        | 6         | 244   |
| 1            | 0        | 8        | 0                                  | 0        | 0        | 4        | 19        | 209   |
| 0            | 321      | 0        | 0                                  | 0        | 0        | 0        | 0         | 392   |
| 155          | 99       | 113      | 17                                 | 2        | 5        | 4        | 1148      | 3209  |
| 253          | 385      | 105      | 2                                  | 1        | 2        | 1        | 114       | 3570  |
| 0            | 7        | 0        | 0                                  | 0        | 0        | 1        | 8         | 44    |
| 4            | 0        | 0        | 0                                  | 0        | 0        | 2        | 43        | 165   |
| 0            | 0        | 0        | 0                                  | 0        | 0        | 0        | 0         | 1     |
| 0            | 1        | 0        | 0                                  | 0        | 0        | 0        | 3         | 21    |
| 0            | 4        | 11       | 0                                  | 0        | 0        | 1        | 11        | 46    |

|             |              |             |            |            |            |            |             |               |
|-------------|--------------|-------------|------------|------------|------------|------------|-------------|---------------|
| 17          | 1273         | 104         | 5          | 0          | 1          | 0          | 30          | 1776          |
| 115         | 8997         | 157         | 11         | 0          | 5          | 15         | 95          | 13660         |
| 1837        | 2485         | 446         | 271        | 1          | 75         | 45         | 816         | 16967         |
| 0           | 0            | 0           | 0          | 0          | 0          | 0          | 0           | 0             |
| <b>3955</b> | <b>16886</b> | <b>2447</b> | <b>370</b> | <b>131</b> | <b>105</b> | <b>170</b> | <b>4867</b> | <b>127504</b> |



| <i>Unicef classification</i>                  | 4          | 2            | 5          | 4                        | 3          | 3           |
|-----------------------------------------------|------------|--------------|------------|--------------------------|------------|-------------|
| Flows of women with FGM/C Baseline hypothesis | Benin      | Burkina Faso | Cameroon   | Central African Republic | Chad       | Ivory Coast |
| Belgium                                       | 16         | 224          | 30         | 10                       | 22         | 321         |
| Bulgaria                                      | 0          | 0            | 0          | 0                        | 0          | 0           |
| Czech Republic                                | 1          | 4            | 0          | 0                        | 2          | 7           |
| Denmark                                       | 1          | 10           | 2          | 1                        | 3          | 18          |
| Germany                                       | 22         | 314          | 53         | 6                        | 29         | 349         |
| Estonia                                       | 0          | 0            | 0          | 0                        | 0          | 0           |
| Ireland                                       | 0          | 0            | 1          | 0                        | 1          | 6           |
| Greece                                        | 0          | 2            | 0          | 0                        | 0          | 2           |
| Spain                                         | 8          | 230          | 14         | 6                        | 10         | 221         |
| France                                        | 143        | 755          | 137        | 469                      | 549        | 4424        |
| Italy                                         | 37         | 2222         | 19         | 5                        | 18         | 1277        |
| Cyprus                                        | 0          | 0            | 0          | 0                        | 0          | 0           |
| Latvia                                        | 0          | 0            | 0          | 0                        | 0          | 0           |
| Lithuania                                     | 0          | 0            | 0          | 0                        | 0          | 0           |
| Luxembourg                                    | 1          | 5            | 1          | 1                        | 1          | 14          |
| Hungary                                       | 0          | 0            | 0          | 0                        | 0          | 1           |
| Malta                                         | 0          | 0            | 0          | 0                        | 0          | 0           |
| Netherlands                                   | 3          | 53           | 4          | 1                        | 4          | 35          |
| Austria                                       | 1          | 30           | 2          | 1                        | 2          | 19          |
| Poland                                        | 0          | 0            | 0          | 0                        | 0          | 0           |
| Portugal                                      | 0          | 4            | 0          | 0                        | 3          | 0           |
| Romania                                       | 0          | 0            | 0          | 0                        | 0          | 0           |
| Slovenia                                      | 0          | 0            | 0          | 0                        | 3          | 0           |
| Slovakia                                      | 0          | 0            | 0          | 0                        | 1          | 0           |
| Finland                                       | 0          | 0            | 1          | 0                        | 0          | 4           |
| Sweden                                        | 1          | 10           | 4          | 3                        | 5          | 40          |
| United Kingdom                                | 0          | 0            | 0          | 0                        | 0          | 0           |
| Croatia                                       | 0          | 0            | 0          | 0                        | 0          | 0           |
| <b>Total</b>                                  | <b>234</b> | <b>3864</b>  | <b>268</b> | <b>504</b>               | <b>651</b> | <b>6739</b> |

| <i>Unicef classification</i>                   | 4     | 2            | 5        | 4                        | 3    | 3           |
|------------------------------------------------|-------|--------------|----------|--------------------------|------|-------------|
| Flows of women with FGM/C Selection hypothesis | Benin | Burkina Faso | Cameroon | Central African Republic | Chad | Ivory Coast |
| Belgium                                        | 7     | 210          | 14       | 6                        | 14   | 219         |
| Bulgaria                                       | 0     | 0            | 0        | 0                        | 0    | 0           |
| Czech Republic                                 | 0     | 4            | 0        | 0                        | 1    | 5           |
| Denmark                                        | 0     | 9            | 1        | 0                        | 2    | 12          |
| Germany                                        | 9     | 295          | 25       | 4                        | 18   | 238         |
| Estonia                                        | 0     | 0            | 0        | 0                        | 0    | 0           |
| Ireland                                        | 0     | 0            | 0        | 0                        | 1    | 4           |
| Greece                                         | 0     | 2            | 0        | 0                        | 0    | 2           |
| Spain                                          | 3     | 216          | 7        | 4                        | 6    | 151         |
| France                                         | 61    | 708          | 65       | 293                      | 343  | 3018        |
| Italy                                          | 16    | 2084         | 9        | 3                        | 11   | 871         |
| Cyprus                                         | 0     | 0            | 0        | 0                        | 0    | 0           |
| Latvia                                         | 0     | 0            | 0        | 0                        | 0    | 0           |
| Lithuania                                      | 0     | 0            | 0        | 0                        | 0    | 0           |
| Luxembourg                                     | 0     | 5            | 1        | 0                        | 0    | 10          |
| Hungary                                        | 0     | 0            | 0        | 0                        | 0    | 1           |
| Malta                                          | 0     | 0            | 0        | 0                        | 0    | 0           |
| Netherlands                                    | 1     | 50           | 2        | 0                        | 2    | 24          |
| Austria                                        | 1     | 28           | 1        | 1                        | 1    | 13          |
| Poland                                         | 0     | 0            | 0        | 0                        | 0    | 0           |

|                |            |             |            |            |            |             |
|----------------|------------|-------------|------------|------------|------------|-------------|
| Portugal       | 0          | 4           | 0          | 0          | 2          | 0           |
| Romania        | 0          | 0           | 0          | 0          | 0          | 0           |
| Slovenia       | 0          | 0           | 0          | 0          | 2          | 0           |
| Slovakia       | 0          | 0           | 0          | 0          | 0          | 0           |
| Finland        | 0          | 0           | 1          | 0          | 0          | 3           |
| Sweden         | 0          | 10          | 2          | 2          | 3          | 27          |
| United Kingdom | 0          | 0           | 0          | 0          | 0          | 0           |
| Croatia        | 0          | 0           | 0          | 0          | 0          | 0           |
| <b>Total</b>   | <b>100</b> | <b>3625</b> | <b>128</b> | <b>314</b> | <b>407</b> | <b>4598</b> |

| <i>1</i>   | <i>1</i>     | <i>1</i>    | <i>2</i>    | <i>2</i>    | <i>5</i>   | <i>1</i>     | <i>3</i>      | <i>5</i>    |
|------------|--------------|-------------|-------------|-------------|------------|--------------|---------------|-------------|
| Djibouti   | Egypt        | Eritrea     | Ethiopia    | Gambia      | Ghana      | Guinea       | Guinea-Bissau | Iraq        |
| 148        | 321          | 105         | 251         | 149         | 35         | 2622         | 9             | 98          |
| 0          | 0            | 0           | 0           | 0           | 0          | 0            | 0             | 0           |
| 1          | 45           | 2           | 20          | 4           | 1          | 27           | 3             | 6           |
| 1          | 56           | 47          | 105         | 64          | 10         | 11           | 5             | 70          |
| 12         | 2063         | 1182        | 1472        | 626         | 117        | 1045         | 69            | 637         |
| 0          | 1            | 0           | 0           | 0           | 0          | 0            | 0             | 0           |
| 0          | 73           | 12          | 27          | 0           | 3          | 17           | 0             | 8           |
| 0          | 1258         | 71          | 513         | 6           | 3          | 3            | 2             | 22          |
| 2          | 415          | 33          | 302         | 4260        | 156        | 3850         | 986           | 12          |
| 82         | 1151         | 101         | 166         | 539         | 10         | 4010         | 82            | 0           |
| 11         | 7034         | 2116        | 1503        | 159         | 211        | 656          | 47            | 20          |
| 0          | 65           | 0           | 19          | 4           | 1          | 0            | 0             | 0           |
| 0          | 1            | 0           | 0           | 0           | 0          | 0            | 0             | 0           |
| 0          | 2            | 1           | 1           | 0           | 0          | 1            | 0             | 0           |
| 1          | 4            | 3           | 21          | 29          | 0          | 46           | 11            | 3           |
| 0          | 57           | 2           | 12          | 1           | 0          | 6            | 0             | 1           |
| 0          | 4            | 44          | 13          | 0           | 0          | 0            | 0             | 1           |
| 3          | 404          | 88          | 454         | 111         | 39         | 150          | 8             | 63          |
| 0          | 706          | 23          | 203         | 438         | 13         | 199          | 32            | 40          |
| 0          | 7            | 3           | 8           | 0           | 0          | 3            | 0             | 1           |
| 4          | 58           | 0           | 22          | 17          | 0          | 0            | 0             | 2           |
| 0          | 0            | 0           | 0           | 0           | 0          | 0            | 0             | 1           |
| 0          | 5            | 0           | 0           | 2           | 0          | 3            | 0             | 0           |
| 0          | 9            | 0           | 3           | 0           | 0          | 1            | 0             | 1           |
| 1          | 34           | 27          | 105         | 57          | 5          | 11           | 0             | 44          |
| 9          | 227          | 1908        | 755         | 492         | 11         | 65           | 5             | 1084        |
| 93         | 507          | 32          | 1786        | 1901        | 323        | 0            | 0             | 10          |
| 0          | 0            | 0           | 0           | 0           | 0          | 0            | 0             | 0           |
| <b>368</b> | <b>14508</b> | <b>5798</b> | <b>7763</b> | <b>8859</b> | <b>937</b> | <b>12728</b> | <b>1259</b>   | <b>2127</b> |

| <i>1</i> | <i>1</i> | <i>1</i> | <i>2</i> | <i>2</i> | <i>5</i> | <i>1</i> | <i>3</i>      | <i>5</i> |
|----------|----------|----------|----------|----------|----------|----------|---------------|----------|
| Djibouti | Egypt    | Eritrea  | Ethiopia | Gambia   | Ghana    | Guinea   | Guinea-Bissau | Iraq     |
| 146      | 301      | 96       | 229      | 142      | 14       | 2542     | 7             | 78       |
| 0        | 0        | 0        | 0        | 0        | 0        | 0        | 0             | 0        |
| 1        | 43       | 2        | 19       | 4        | 0        | 26       | 2             | 5        |
| 1        | 52       | 43       | 96       | 61       | 4        | 11       | 3             | 55       |
| 12       | 1936     | 1083     | 1341     | 599      | 46       | 1013     | 51            | 503      |
| 0        | 1        | 0        | 0        | 0        | 0        | 0        | 0             | 0        |
| 0        | 69       | 11       | 24       | 0        | 1        | 17       | 0             | 6        |
| 0        | 1181     | 65       | 468      | 6        | 1        | 3        | 1             | 17       |
| 2        | 390      | 30       | 276      | 4076     | 61       | 3733     | 723           | 10       |
| 81       | 1080     | 92       | 151      | 516      | 4        | 3887     | 60            | 0        |
| 11       | 6602     | 1937     | 1370     | 152      | 83       | 636      | 35            | 16       |
| 0        | 61       | 0        | 17       | 4        | 0        | 0        | 0             | 0        |
| 0        | 1        | 0        | 0        | 0        | 0        | 0        | 0             | 0        |
| 0        | 2        | 1        | 1        | 0        | 0        | 1        | 0             | 0        |
| 1        | 4        | 2        | 19       | 28       | 0        | 45       | 8             | 2        |
| 0        | 53       | 2        | 11       | 1        | 0        | 5        | 0             | 1        |
| 0        | 4        | 41       | 12       | 0        | 0        | 0        | 0             | 1        |
| 3        | 379      | 81       | 414      | 106      | 15       | 145      | 6             | 50       |
| 0        | 662      | 21       | 185      | 419      | 5        | 193      | 23            | 31       |
| 0        | 7        | 2        | 7        | 0        | 0        | 3        | 0             | 1        |

|            |              |             |             |             |            |              |            |             |
|------------|--------------|-------------|-------------|-------------|------------|--------------|------------|-------------|
| 4          | 54           | 0           | 20          | 17          | 0          | 0            | 0          | 2           |
| 0          | 0            | 0           | 0           | 0           | 0          | 0            | 0          | 1           |
| 0          | 5            | 0           | 0           | 2           | 0          | 3            | 0          | 0           |
| 0          | 9            | 0           | 2           | 0           | 0          | 1            | 0          | 1           |
| 1          | 32           | 25          | 96          | 54          | 2          | 11           | 0          | 35          |
| 9          | 213          | 1747        | 688         | 471         | 4          | 63           | 4          | 856         |
| 92         | 476          | 29          | 1627        | 1819        | 127        | 0            | 0          | 8           |
| 0          | 0            | 0           | 0           | 0           | 0          | 0            | 0          | 0           |
| <b>363</b> | <b>13616</b> | <b>5309</b> | <b>7074</b> | <b>8477</b> | <b>370</b> | <b>12339</b> | <b>923</b> | <b>1681</b> |

| 3           | 2           | 1            | 2           | 5         | 3            | 3            | 1            | 1            |
|-------------|-------------|--------------|-------------|-----------|--------------|--------------|--------------|--------------|
| Kenya       | Liberia     | Mali         | Mauritania  | Niger     | Nigeria      | Senegal      | Sierra Leone | Somalia      |
| 67          | 44          | 203          | 142         | 9         | 330          | 236          | 145          | 391          |
| 0           | 0           | 0            | 0           | 0         | 0            | 0            | 0            | 0            |
| 5           | 2           | 11           | 1           | 0         | 31           | 3            | 4            | 13           |
| 37          | 13          | 3            | 2           | 0         | 55           | 5            | 31           | 946          |
| 684         | 665         | 180          | 78          | 3         | 1374         | 135          | 811          | 745          |
| 0           | 0           | 0            | 0           | 0         | 0            | 0            | 0            | 0            |
| 18          | 19          | 3            | 10          | 0         | 312          | 0            | 11           | 326          |
| 33          | 3           | 0            | 0           | 0         | 257          | 2            | 16           | 0            |
| 60          | 88          | 5479         | 1493        | 1         | 2631         | 3386         | 282          | 86           |
| 9           | 0           | 9113         | 1353        | 34        | 94           | 3706         | 194          | 0            |
| 86          | 383         | 295          | 55          | 3         | 1977         | 3758         | 281          | 1419         |
| 3           | 0           | 0            | 0           | 0         | 4            | 1            | 0            | 0            |
| 0           | 0           | 0            | 0           | 0         | 0            | 0            | 0            | 1            |
| 0           | 0           | 0            | 0           | 0         | 2            | 0            | 0            | 10           |
| 1           | 24          | 4            | 1           | 0         | 37           | 12           | 24           | 21           |
| 5           | 0           | 1            | 0           | 0         | 80           | 1            | 2            | 0            |
| 0           | 0           | 19           | 0           | 0         | 1            | 0            | 0            | 383          |
| 69          | 40          | 21           | 4           | 1         | 249          | 31           | 178          | 118          |
| 59          | 119         | 41           | 8           | 0         | 844          | 31           | 290          | 459          |
| 4           | 0           | 0            | 0           | 0         | 3            | 1            | 0            | 8            |
| 8           | 0           | 0            | 0           | 0         | 10           | 0            | 4            | 0            |
| 0           | 0           | 0            | 0           | 0         | 0            | 0            | 0            | 0            |
| 1           | 0           | 1            | 0           | 0         | 3            | 0            | 0            | 2            |
| 1           | 0           | 1            | 0           | 0         | 3            | 1            | 0            | 5            |
| 39          | 10          | 0            | 0           | 0         | 47           | 5            | 19           | 1520         |
| 60          | 65          | 25           | 4           | 0         | 169          | 19           | 131          | 10741        |
| 1226        | 19          | 0            | 48          | 0         | 4929         | 39           | 2102         | 2966         |
| 0           | 0           | 0            | 0           | 0         | 0            | 0            | 0            | 0            |
| <b>2474</b> | <b>1493</b> | <b>15399</b> | <b>3200</b> | <b>52</b> | <b>13444</b> | <b>11370</b> | <b>4525</b>  | <b>20160</b> |

| 3     | 2       | 1    | 2          | 5     | 3       | 3       | 1            | 1       |
|-------|---------|------|------------|-------|---------|---------|--------------|---------|
| Kenya | Liberia | Mali | Mauritania | Niger | Nigeria | Senegal | Sierra Leone | Somalia |
| 40    | 30      | 203  | 106        | 5     | 409     | 192     | 127          | 385     |
| 0     | 0       | 0    | 0          | 0     | 0       | 0       | 0            | 0       |
| 3     | 1       | 11   | 1          | 0     | 39      | 2       | 4            | 13      |
| 22    | 9       | 3    | 2          | 0     | 68      | 4       | 27           | 933     |
| 413   | 451     | 181  | 58         | 2     | 1707    | 110     | 709          | 735     |
| 0     | 0       | 0    | 0          | 0     | 1       | 0       | 0            | 0       |
| 11    | 13      | 3    | 8          | 0     | 388     | 0       | 9            | 321     |
| 20    | 2       | 0    | 0          | 0     | 319     | 2       | 14           | 0       |
| 36    | 59      | 5504 | 1117       | 1     | 3268    | 2755    | 246          | 85      |
| 5     | 0       | 9154 | 1012       | 19    | 117     | 3016    | 169          | 0       |
| 52    | 260     | 296  | 41         | 2     | 2455    | 3058    | 246          | 1399    |
| 2     | 0       | 0    | 0          | 0     | 5       | 0       | 0            | 0       |
| 0     | 0       | 0    | 0          | 0     | 0       | 0       | 0            | 1       |
| 0     | 0       | 0    | 0          | 0     | 3       | 0       | 0            | 10      |
| 1     | 17      | 4    | 1          | 0     | 45      | 10      | 21           | 21      |
| 3     | 0       | 1    | 0          | 0     | 100     | 1       | 1            | 0       |
| 0     | 0       | 19   | 0          | 0     | 1       | 0       | 0            | 378     |
| 42    | 27      | 21   | 3          | 0     | 309     | 25      | 155          | 116     |
| 36    | 81      | 41   | 6          | 0     | 1048    | 25      | 253          | 453     |
| 2     | 0       | 0    | 0          | 0     | 4       | 1       | 0            | 8       |

|             |             |              |             |           |              |             |             |              |
|-------------|-------------|--------------|-------------|-----------|--------------|-------------|-------------|--------------|
| 5           | 0           | 0            | 0           | 0         | 13           | 0           | 4           | 0            |
| 0           | 0           | 0            | 0           | 0         | 0            | 0           | 0           | 0            |
| 1           | 0           | 1            | 0           | 0         | 4            | 0           | 0           | 2            |
| 1           | 0           | 1            | 0           | 0         | 3            | 1           | 0           | 5            |
| 24          | 7           | 0            | 0           | 0         | 59           | 4           | 17          | 1499         |
| 36          | 44          | 25           | 3           | 0         | 210          | 16          | 115         | 10591        |
| 739         | 13          | 0            | 36          | 0         | 6121         | 32          | 1837        | 2925         |
| 0           | 0           | 0            | 0           | 0         | 0            | 0           | 0           | 0            |
| <b>1492</b> | <b>1012</b> | <b>15469</b> | <b>2393</b> | <b>29</b> | <b>16697</b> | <b>9253</b> | <b>3954</b> | <b>19879</b> |

| 1           | 4                                  | 5          | 5          | 4          | 2           |               |
|-------------|------------------------------------|------------|------------|------------|-------------|---------------|
| Sudan       | Tanzania,<br>United<br>Republic of | Togo       | Uganda     | Yemen      | Indonesia   | Total         |
| 167         | 32                                 | 30         | 3          | 4          | 247         | 6409          |
| 0           | 0                                  | 0          | 0          | 0          | 0           | 0             |
| 10          | 2                                  | 0          | 0          | 9          | 26          | 243           |
| 103         | 16                                 | 1          | 4          | 1          | 80          | 1696          |
| 726         | 67                                 | 116        | 9          | 98         | 1377        | 15066         |
| 0           | 0                                  | 0          | 0          | 0          | 0           | 3             |
| 137         | 2                                  | 0          | 1          | 3          | 9           | 999           |
| 40          | 5                                  | 0          | 1          | 0          | 74          | 2315          |
| 69          | 11                                 | 7          | 1          | 2          | 97          | 24200         |
| 271         | 0                                  | 92         | 0          | 0          | 279         | 27760         |
| 228         | 29                                 | 37         | 2          | 11         | 192         | 24089         |
| 2           | 0                                  | 0          | 0          | 0          | 16          | 114           |
| 0           | 0                                  | 0          | 0          | 0          | 0           | 2             |
| 1           | 0                                  | 0          | 0          | 0          | 0           | 19            |
| 6           | 0                                  | 2          | 0          | 0          | 5           | 279           |
| 9           | 1                                  | 0          | 0          | 5          | 18          | 203           |
| 0           | 0                                  | 0          | 0          | 0          | 0           | 466           |
| 133         | 44                                 | 4          | 6          | 5          | 1070        | 3392          |
| 123         | 6                                  | 2          | 2          | 2          | 106         | 3800          |
| 0           | 1                                  | 0          | 0          | 2          | 8           | 49            |
| 0           | 0                                  | 0          | 0          | 2          | 41          | 177           |
| 0           | 0                                  | 0          | 0          | 0          | 0           | 1             |
| 0           | 0                                  | 0          | 0          | 0          | 3           | 24            |
| 13          | 0                                  | 0          | 0          | 1          | 10          | 51            |
| 122         | 13                                 | 0          | 1          | 1          | 28          | 2094          |
| 184         | 29                                 | 1          | 6          | 20         | 89          | 16162         |
| 522         | 704                                | 2          | 90         | 59         | 760         | 18118         |
| 0           | 0                                  | 0          | 0          | 0          | 0           | 0             |
| <b>2866</b> | <b>963</b>                         | <b>293</b> | <b>126</b> | <b>224</b> | <b>4534</b> | <b>147731</b> |

| 1     | 4                                  | 5    | 5      | 4     | 2         |       |
|-------|------------------------------------|------|--------|-------|-----------|-------|
| Sudan | Tanzania,<br>United<br>Republic of | Togo | Uganda | Yemen | Indonesia | Total |
| 154   | 13                                 | 12   | 3      | 3     | 249       | 5956  |
| 0     | 0                                  | 0    | 0      | 0     | 0         | 0     |
| 10    | 1                                  | 0    | 0      | 7     | 27        | 230   |
| 94    | 6                                  | 0    | 4      | 1     | 81        | 1604  |
| 669   | 26                                 | 48   | 10     | 76    | 1386      | 13753 |
| 0     | 0                                  | 0    | 0      | 0     | 0         | 3     |
| 126   | 1                                  | 0    | 1      | 3     | 9         | 1025  |
| 37    | 2                                  | 0    | 1      | 0     | 74        | 2218  |
| 64    | 4                                  | 3    | 1      | 1     | 98        | 22929 |
| 249   | 0                                  | 38   | 0      | 0     | 280       | 24419 |
| 210   | 11                                 | 15   | 2      | 9     | 193       | 22084 |
| 2     | 0                                  | 0    | 0      | 0     | 16        | 108   |
| 0     | 0                                  | 0    | 0      | 0     | 0         | 2     |
| 1     | 0                                  | 0    | 0      | 0     | 0         | 19    |
| 6     | 0                                  | 1    | 0      | 0     | 5         | 257   |
| 8     | 0                                  | 0    | 0      | 4     | 18        | 212   |
| 0     | 0                                  | 0    | 0      | 0     | 0         | 455   |
| 122   | 17                                 | 2    | 7      | 4     | 1077      | 3207  |
| 113   | 2                                  | 1    | 3      | 1     | 107       | 3753  |
| 0     | 0                                  | 0    | 0      | 1     | 8         | 45    |

|      |     |     |     |     |      |        |
|------|-----|-----|-----|-----|------|--------|
| 0    | 0   | 0   | 0   | 2   | 41   | 167    |
| 0    | 0   | 0   | 0   | 0   | 0    | 1      |
| 0    | 0   | 0   | 0   | 0   | 3    | 23     |
| 12   | 0   | 0   | 0   | 1   | 11   | 48     |
| 113  | 5   | 0   | 1   | 0   | 28   | 2014   |
| 170  | 11  | 0   | 6   | 16  | 89   | 15432  |
| 481  | 277 | 1   | 94  | 46  | 765  | 17545  |
| 0    | 0   | 0   | 0   | 0   | 0    | 0      |
| 2640 | 378 | 121 | 132 | 173 | 4564 | 137509 |



| <i>Unicef classification</i>                  | 4          | 2            | 5          | 4                        | 3          | 3           |
|-----------------------------------------------|------------|--------------|------------|--------------------------|------------|-------------|
| Flows of women with FGM/C Baseline hypothesis | Benin      | Burkina Faso | Cameroon   | Central African Republic | Chad       | Ivory Coast |
| Belgium                                       | 14         | 221          | 28         | 10                       | 24         | 331         |
| Bulgaria                                      | 0          | 0            | 0          | 0                        | 0          | 0           |
| Czech Republic                                | 1          | 4            | 0          | 0                        | 3          | 8           |
| Denmark                                       | 1          | 10           | 1          | 1                        | 3          | 18          |
| Germany                                       | 19         | 310          | 48         | 6                        | 32         | 360         |
| Estonia                                       | 0          | 0            | 0          | 0                        | 0          | 0           |
| Ireland                                       | 0          | 0            | 1          | 0                        | 1          | 6           |
| Greece                                        | 0          | 2            | 0          | 0                        | 0          | 2           |
| Spain                                         | 7          | 227          | 13         | 6                        | 11         | 228         |
| France                                        | 125        | 744          | 125        | 443                      | 611        | 4560        |
| Italy                                         | 32         | 2191         | 18         | 4                        | 20         | 1316        |
| Cyprus                                        | 0          | 0            | 0          | 0                        | 0          | 0           |
| Latvia                                        | 0          | 0            | 0          | 0                        | 0          | 0           |
| Lithuania                                     | 0          | 0            | 0          | 0                        | 0          | 0           |
| Luxembourg                                    | 1          | 5            | 1          | 1                        | 1          | 15          |
| Hungary                                       | 0          | 0            | 0          | 0                        | 0          | 1           |
| Malta                                         | 0          | 0            | 0          | 0                        | 0          | 0           |
| Netherlands                                   | 2          | 52           | 3          | 1                        | 4          | 37          |
| Austria                                       | 1          | 29           | 2          | 1                        | 2          | 19          |
| Poland                                        | 0          | 0            | 0          | 0                        | 0          | 0           |
| Portugal                                      | 0          | 4            | 0          | 0                        | 3          | 0           |
| Romania                                       | 0          | 0            | 0          | 0                        | 0          | 0           |
| Slovenia                                      | 0          | 0            | 0          | 0                        | 3          | 0           |
| Slovakia                                      | 0          | 0            | 0          | 0                        | 1          | 0           |
| Finland                                       | 0          | 0            | 1          | 0                        | 0          | 5           |
| Sweden                                        | 0          | 10           | 3          | 3                        | 5          | 41          |
| United Kingdom                                | 0          | 0            | 0          | 0                        | 0          | 0           |
| Croatia                                       | 0          | 0            | 0          | 0                        | 0          | 0           |
| <b>Total</b>                                  | <b>204</b> | <b>3811</b>  | <b>246</b> | <b>476</b>               | <b>725</b> | <b>6947</b> |

| <i>Unicef classification</i>                   | 4     | 2            | 5        | 4                        | 3    | 3           |
|------------------------------------------------|-------|--------------|----------|--------------------------|------|-------------|
| Flows of women with FGM/C Selection hypothesis | Benin | Burkina Faso | Cameroon | Central African Republic | Chad | Ivory Coast |
| Belgium                                        | 6     | 207          | 13       | 6                        | 15   | 226         |
| Bulgaria                                       | 0     | 0            | 0        | 0                        | 0    | 0           |
| Czech Republic                                 | 0     | 4            | 0        | 0                        | 2    | 5           |
| Denmark                                        | 0     | 9            | 1        | 0                        | 2    | 12          |
| Germany                                        | 8     | 291          | 23       | 4                        | 20   | 246         |
| Estonia                                        | 0     | 0            | 0        | 0                        | 0    | 0           |
| Ireland                                        | 0     | 0            | 0        | 0                        | 1    | 4           |
| Greece                                         | 0     | 2            | 0        | 0                        | 0    | 2           |
| Spain                                          | 3     | 213          | 6        | 4                        | 7    | 155         |
| France                                         | 53    | 698          | 60       | 277                      | 382  | 3111        |
| Italy                                          | 14    | 2055         | 8        | 3                        | 12   | 898         |
| Cyprus                                         | 0     | 0            | 0        | 0                        | 0    | 0           |
| Latvia                                         | 0     | 0            | 0        | 0                        | 0    | 0           |
| Lithuania                                      | 0     | 0            | 0        | 0                        | 0    | 0           |
| Luxembourg                                     | 0     | 5            | 0        | 0                        | 0    | 10          |
| Hungary                                        | 0     | 0            | 0        | 0                        | 0    | 1           |
| Malta                                          | 0     | 0            | 0        | 0                        | 0    | 0           |
| Netherlands                                    | 1     | 49           | 2        | 0                        | 3    | 25          |
| Austria                                        | 1     | 27           | 1        | 1                        | 1    | 13          |
| Poland                                         | 0     | 0            | 0        | 0                        | 0    | 0           |

|                |           |             |            |            |            |             |
|----------------|-----------|-------------|------------|------------|------------|-------------|
| Portugal       | 0         | 4           | 0          | 0          | 2          | 0           |
| Romania        | 0         | 0           | 0          | 0          | 0          | 0           |
| Slovenia       | 0         | 0           | 0          | 0          | 2          | 0           |
| Slovakia       | 0         | 0           | 0          | 0          | 0          | 0           |
| Finland        | 0         | 0           | 1          | 0          | 0          | 3           |
| Sweden         | 0         | 10          | 2          | 2          | 3          | 28          |
| United Kingdom | 0         | 0           | 0          | 0          | 0          | 0           |
| Croatia        | 0         | 0           | 0          | 0          | 0          | 0           |
| <b>Total</b>   | <b>87</b> | <b>3575</b> | <b>117</b> | <b>297</b> | <b>453</b> | <b>4740</b> |

| <i>1</i>   | <i>1</i>     | <i>1</i>    | <i>2</i>    | <i>2</i>     | <i>5</i>   | <i>1</i>     | <i>3</i>      | <i>5</i>    |
|------------|--------------|-------------|-------------|--------------|------------|--------------|---------------|-------------|
| Djibouti   | Egypt        | Eritrea     | Ethiopia    | Gambia       | Ghana      | Guinea       | Guinea-Bissau | Iraq        |
| 153        | 330          | 107         | 234         | 176          | 30         | 2869         | 10            | 88          |
| 0          | 0            | 0           | 0           | 0            | 0          | 0            | 0             | 0           |
| 1          | 47           | 2           | 19          | 4            | 1          | 30           | 4             | 6           |
| 1          | 57           | 48          | 98          | 76           | 9          | 12           | 5             | 62          |
| 13         | 2122         | 1205        | 1371        | 740          | 102        | 1143         | 78            | 569         |
| 0          | 1            | 0           | 0           | 0            | 0          | 0            | 0             | 0           |
| 0          | 75           | 12          | 25          | 0            | 2          | 19           | 0             | 7           |
| 0          | 1294         | 72          | 478         | 7            | 2          | 4            | 2             | 20          |
| 2          | 427          | 34          | 282         | 5034         | 135        | 4212         | 1113          | 11          |
| 85         | 1183         | 103         | 154         | 637          | 9          | 4387         | 92            | 0           |
| 11         | 7234         | 2156        | 1400        | 188          | 183        | 718          | 54            | 18          |
| 0          | 67           | 0           | 18          | 5            | 1          | 0            | 0             | 0           |
| 0          | 1            | 0           | 0           | 0            | 0          | 0            | 0             | 0           |
| 0          | 2            | 1           | 1           | 0            | 0          | 1            | 0             | 0           |
| 1          | 5            | 3           | 19          | 35           | 0          | 51           | 12            | 2           |
| 0          | 58           | 2           | 11          | 1            | 0          | 6            | 0             | 1           |
| 0          | 4            | 45          | 12          | 0            | 0          | 0            | 0             | 1           |
| 4          | 415          | 90          | 423         | 131          | 34         | 164          | 9             | 57          |
| 0          | 726          | 23          | 189         | 518          | 11         | 218          | 36            | 35          |
| 0          | 7            | 3           | 7           | 0            | 0          | 4            | 0             | 1           |
| 4          | 60           | 0           | 21          | 21           | 0          | 0            | 0             | 2           |
| 0          | 0            | 0           | 0           | 0            | 0          | 0            | 0             | 1           |
| 0          | 6            | 0           | 0           | 2            | 0          | 4            | 0             | 0           |
| 0          | 9            | 0           | 3           | 0            | 0          | 1            | 0             | 1           |
| 1          | 35           | 27          | 98          | 67           | 4          | 12           | 0             | 39          |
| 9          | 234          | 1944        | 704         | 581          | 9          | 71           | 6             | 968         |
| 96         | 522          | 32          | 1664        | 2246         | 281        | 0            | 0             | 9           |
| 0          | 0            | 0           | 0           | 0            | 0          | 0            | 0             | 0           |
| <b>380</b> | <b>14921</b> | <b>5908</b> | <b>7231</b> | <b>10467</b> | <b>815</b> | <b>13924</b> | <b>1421</b>   | <b>1901</b> |

| <i>1</i> | <i>1</i> | <i>1</i> | <i>2</i> | <i>2</i> | <i>5</i> | <i>1</i> | <i>3</i>      | <i>5</i> |
|----------|----------|----------|----------|----------|----------|----------|---------------|----------|
| Djibouti | Egypt    | Eritrea  | Ethiopia | Gambia   | Ghana    | Guinea   | Guinea-Bissau | Iraq     |
| 151      | 310      | 98       | 213      | 168      | 12       | 2781     | 7             | 69       |
| 0        | 0        | 0        | 0        | 0        | 0        | 0        | 0             | 0        |
| 1        | 44       | 2        | 17       | 4        | 0        | 29       | 3             | 4        |
| 1        | 54       | 44       | 89       | 72       | 3        | 12       | 4             | 49       |
| 12       | 1991     | 1103     | 1249     | 708      | 40       | 1108     | 57            | 449      |
| 0        | 1        | 0        | 0        | 0        | 0        | 0        | 0             | 0        |
| 0        | 71       | 11       | 23       | 0        | 1        | 18       | 0             | 6        |
| 0        | 1215     | 66       | 436      | 7        | 1        | 3        | 1             | 16       |
| 2        | 401      | 31       | 257      | 4816     | 53       | 4083     | 816           | 9        |
| 84       | 1111     | 94       | 141      | 609      | 3        | 4253     | 68            | 0        |
| 11       | 6790     | 1974     | 1276     | 180      | 72       | 696      | 39            | 14       |
| 0        | 63       | 0        | 16       | 4        | 0        | 0        | 0             | 0        |
| 0        | 1        | 0        | 0        | 0        | 0        | 0        | 0             | 0        |
| 0        | 2        | 1        | 1        | 0        | 0        | 1        | 0             | 0        |
| 1        | 4        | 2        | 18       | 33       | 0        | 49       | 9             | 2        |
| 0        | 55       | 2        | 10       | 1        | 0        | 6        | 0             | 1        |
| 0        | 4        | 42       | 11       | 0        | 0        | 0        | 0             | 1        |
| 4        | 390      | 82       | 386      | 125      | 13       | 159      | 6             | 45       |
| 0        | 681      | 21       | 172      | 495      | 5        | 211      | 26            | 28       |
| 0        | 7        | 2        | 7        | 0        | 0        | 3        | 0             | 1        |

|            |              |             |             |              |            |              |             |             |
|------------|--------------|-------------|-------------|--------------|------------|--------------|-------------|-------------|
| 4          | 56           | 0           | 19          | 20           | 0          | 0            | 0           | 2           |
| 0          | 0            | 0           | 0           | 0            | 0          | 0            | 0           | 1           |
| 0          | 5            | 0           | 0           | 2            | 0          | 3            | 0           | 0           |
| 0          | 9            | 0           | 2           | 0            | 0          | 1            | 0           | 1           |
| 1          | 33           | 25          | 89          | 64           | 2          | 12           | 0           | 31          |
| 9          | 219          | 1780        | 641         | 556          | 4          | 69           | 4           | 765         |
| 95         | 490          | 29          | 1516        | 2149         | 111        | 0            | 0           | 7           |
| 0          | 0            | 0           | 0           | 0            | 0          | 0            | 0           | 0           |
| <b>375</b> | <b>14004</b> | <b>5410</b> | <b>6589</b> | <b>10015</b> | <b>322</b> | <b>13499</b> | <b>1041</b> | <b>1502</b> |

| 3           | 2           | 1            | 2           | 5         | 3            | 3            | 1            | 1            |
|-------------|-------------|--------------|-------------|-----------|--------------|--------------|--------------|--------------|
| Kenya       | Liberia     | Mali         | Mauritania  | Niger     | Nigeria      | Senegal      | Sierra Leone | Somalia      |
| 62          | 42          | 241          | 150         | 9         | 322          | 263          | 140          | 444          |
| 0           | 0           | 0            | 0           | 0         | 0            | 0            | 0            | 0            |
| 4           | 1           | 13           | 1           | 0         | 31           | 3            | 4            | 15           |
| 34          | 12          | 3            | 2           | 0         | 54           | 6            | 30           | 1076         |
| 640         | 639         | 215          | 83          | 3         | 1340         | 150          | 780          | 848          |
| 0           | 0           | 0            | 0           | 0         | 0            | 0            | 0            | 0            |
| 17          | 18          | 3            | 11          | 0         | 305          | 0            | 10           | 370          |
| 31          | 3           | 0            | 0           | 0         | 251          | 3            | 15           | 0            |
| 56          | 84          | 6527         | 1586        | 1         | 2567         | 3773         | 271          | 98           |
| 8           | 0           | 10855        | 1437        | 36        | 92           | 4130         | 186          | 0            |
| 80          | 368         | 351          | 58          | 3         | 1928         | 4187         | 270          | 1614         |
| 2           | 0           | 0            | 0           | 0         | 4            | 1            | 0            | 0            |
| 0           | 0           | 0            | 0           | 0         | 0            | 0            | 0            | 1            |
| 0           | 0           | 0            | 0           | 0         | 2            | 0            | 0            | 11           |
| 1           | 23          | 5            | 1           | 0         | 36           | 13           | 23           | 24           |
| 5           | 0           | 1            | 0           | 0         | 78           | 1            | 1            | 0            |
| 0           | 0           | 22           | 0           | 0         | 1            | 0            | 0            | 436          |
| 65          | 38          | 25           | 5           | 1         | 243          | 34           | 171          | 134          |
| 55          | 115         | 49           | 8           | 0         | 823          | 34           | 278          | 522          |
| 4           | 0           | 0            | 0           | 0         | 3            | 1            | 0            | 9            |
| 7           | 0           | 0            | 0           | 0         | 10           | 0            | 4            | 0            |
| 0           | 0           | 0            | 0           | 0         | 0            | 0            | 0            | 0            |
| 1           | 0           | 1            | 0           | 0         | 3            | 0            | 0            | 2            |
| 1           | 0           | 1            | 0           | 0         | 3            | 1            | 0            | 6            |
| 37          | 9           | 0            | 0           | 0         | 46           | 5            | 19           | 1729         |
| 56          | 62          | 30           | 4           | 0         | 165          | 21           | 126          | 12218        |
| 1146        | 18          | 0            | 52          | 0         | 4808         | 43           | 2020         | 3374         |
| 0           | 0           | 0            | 0           | 0         | 0            | 0            | 0            | 0            |
| <b>2313</b> | <b>1433</b> | <b>18343</b> | <b>3400</b> | <b>55</b> | <b>13114</b> | <b>12669</b> | <b>4349</b>  | <b>22931</b> |

| 3     | 2       | 1     | 2          | 5     | 3       | 3       | 1            | 1       |
|-------|---------|-------|------------|-------|---------|---------|--------------|---------|
| Kenya | Liberia | Mali  | Mauritania | Niger | Nigeria | Senegal | Sierra Leone | Somalia |
| 38    | 28      | 242   | 112        | 5     | 399     | 214     | 122          | 438     |
| 0     | 0       | 0     | 0          | 0     | 0       | 0       | 0            | 0       |
| 3     | 1       | 13    | 1          | 0     | 38      | 3       | 4            | 15      |
| 21    | 8       | 3     | 2          | 0     | 67      | 5       | 26           | 1061    |
| 386   | 433     | 216   | 62         | 2     | 1665    | 122     | 682          | 836     |
| 0     | 0       | 0     | 0          | 0     | 1       | 0       | 0            | 0       |
| 10    | 12      | 3     | 8          | 0     | 378     | 0       | 9            | 365     |
| 19    | 2       | 0     | 0          | 0     | 311     | 2       | 13           | 0       |
| 34    | 57      | 6557  | 1186       | 1     | 3188    | 3070    | 237          | 97      |
| 5     | 0       | 10904 | 1075       | 20    | 114     | 3361    | 163          | 0       |
| 48    | 249     | 353   | 44         | 2     | 2395    | 3407    | 236          | 1591    |
| 1     | 0       | 0     | 0          | 0     | 5       | 0       | 0            | 0       |
| 0     | 0       | 0     | 0          | 0     | 0       | 0       | 0            | 1       |
| 0     | 0       | 0     | 0          | 0     | 3       | 0       | 0            | 11      |
| 1     | 16      | 5     | 1          | 0     | 44      | 11      | 20           | 24      |
| 3     | 0       | 1     | 0          | 0     | 97      | 1       | 1            | 0       |
| 0     | 0       | 22    | 0          | 0     | 1       | 0       | 0            | 429     |
| 39    | 26      | 26    | 3          | 0     | 302     | 28      | 149          | 132     |
| 33    | 78      | 49    | 6          | 0     | 1022    | 28      | 243          | 515     |
| 2     | 0       | 0     | 0          | 0     | 4       | 1       | 0            | 9       |

|             |            |              |             |           |              |              |             |              |
|-------------|------------|--------------|-------------|-----------|--------------|--------------|-------------|--------------|
| 4           | 0          | 0            | 0           | 0         | 12           | 0            | 4           | 0            |
| 0           | 0          | 0            | 0           | 0         | 0            | 0            | 0           | 0            |
| 1           | 0          | 1            | 0           | 0         | 4            | 0            | 0           | 2            |
| 1           | 0          | 1            | 0           | 0         | 3            | 1            | 0           | 6            |
| 22          | 6          | 0            | 0           | 0         | 57           | 4            | 16          | 1705         |
| 34          | 42         | 30           | 3           | 0         | 205          | 17           | 110         | 12047        |
| 691         | 12         | 0            | 39          | 0         | 5971         | 35           | 1765        | 3327         |
| 0           | 0          | 0            | 0           | 0         | 0            | 0            | 0           | 0            |
| <b>1395</b> | <b>972</b> | <b>18426</b> | <b>2543</b> | <b>30</b> | <b>16287</b> | <b>10310</b> | <b>3800</b> | <b>22611</b> |

| 1           | 4                                  | 5          | 5          | 4          | 2           |               |
|-------------|------------------------------------|------------|------------|------------|-------------|---------------|
| Sudan       | Tanzania,<br>United<br>Republic of | Togo       | Uganda     | Yemen      | Indonesia   | Total         |
| 172         | 30                                 | 26         | 4          | 4          | 200         | 6734          |
| 0           | 0                                  | 0          | 0          | 0          | 0           | 0             |
| 11          | 2                                  | 0          | 0          | 9          | 21          | 244           |
| 105         | 15                                 | 1          | 5          | 1          | 65          | 1810          |
| 746         | 63                                 | 103        | 12         | 96         | 1117        | 14951         |
| 0           | 0                                  | 0          | 0          | 0          | 0           | 3             |
| 140         | 2                                  | 0          | 1          | 3          | 7           | 1038          |
| 42          | 5                                  | 0          | 1          | 0          | 60          | 2294          |
| 71          | 11                                 | 6          | 1          | 2          | 79          | 26873         |
| 278         | 0                                  | 82         | 0          | 0          | 226         | 30588         |
| 234         | 27                                 | 33         | 3          | 11         | 155         | 24867         |
| 2           | 0                                  | 0          | 0          | 0          | 13          | 112           |
| 0           | 0                                  | 0          | 0          | 0          | 0           | 2             |
| 1           | 0                                  | 0          | 0          | 0          | 0           | 20            |
| 6           | 0                                  | 2          | 0          | 0          | 4           | 290           |
| 9           | 1                                  | 0          | 0          | 5          | 15          | 199           |
| 0           | 0                                  | 0          | 0          | 0          | 0           | 522           |
| 136         | 41                                 | 4          | 8          | 5          | 867         | 3202          |
| 126         | 6                                  | 2          | 3          | 2          | 86          | 3920          |
| 0           | 1                                  | 0          | 0          | 2          | 6           | 48            |
| 0           | 0                                  | 0          | 0          | 2          | 33          | 172           |
| 0           | 0                                  | 0          | 0          | 0          | 0           | 1             |
| 0           | 0                                  | 0          | 0          | 0          | 2           | 25            |
| 13          | 0                                  | 0          | 0          | 1          | 8           | 50            |
| 126         | 12                                 | 0          | 1          | 1          | 23          | 2297          |
| 189         | 28                                 | 1          | 8          | 20         | 72          | 17589         |
| 536         | 663                                | 2          | 113        | 58         | 616         | 18299         |
| 0           | 0                                  | 0          | 0          | 0          | 0           | 0             |
| <b>2943</b> | <b>907</b>                         | <b>262</b> | <b>159</b> | <b>220</b> | <b>3676</b> | <b>156151</b> |

| 1     | 4                                  | 5    | 5      | 4     | 2         |       |
|-------|------------------------------------|------|--------|-------|-----------|-------|
| Sudan | Tanzania,<br>United<br>Republic of | Togo | Uganda | Yemen | Indonesia | Total |
| 158   | 12                                 | 11   | 4      | 3     | 202       | 6272  |
| 0     | 0                                  | 0    | 0      | 0     | 0         | 0     |
| 10    | 1                                  | 0    | 0      | 7     | 21        | 231   |
| 97    | 6                                  | 0    | 5      | 1     | 65        | 1719  |
| 687   | 25                                 | 43   | 12     | 74    | 1124      | 13678 |
| 0     | 0                                  | 0    | 0      | 0     | 0         | 2     |
| 129   | 1                                  | 0    | 1      | 3     | 8         | 1063  |
| 38    | 2                                  | 0    | 1      | 0     | 60        | 2197  |
| 65    | 4                                  | 2    | 1      | 1     | 79        | 25435 |
| 256   | 0                                  | 34   | 0      | 0     | 227       | 27101 |
| 216   | 11                                 | 14   | 3      | 8     | 156       | 22776 |
| 2     | 0                                  | 0    | 0      | 0     | 13        | 106   |
| 0     | 0                                  | 0    | 0      | 0     | 0         | 2     |
| 1     | 0                                  | 0    | 0      | 0     | 0         | 20    |
| 6     | 0                                  | 1    | 0      | 0     | 4         | 267   |
| 9     | 0                                  | 0    | 0      | 4     | 15        | 207   |
| 0     | 0                                  | 0    | 0      | 0     | 0         | 511   |
| 126   | 16                                 | 2    | 8      | 4     | 873       | 3023  |
| 116   | 2                                  | 1    | 3      | 1     | 87        | 3869  |
| 0     | 0                                  | 0    | 0      | 1     | 6         | 44    |

|      |     |     |     |     |      |        |
|------|-----|-----|-----|-----|------|--------|
| 0    | 0   | 0   | 0   | 2   | 33   | 162    |
| 0    | 0   | 0   | 0   | 0   | 0    | 1      |
| 0    | 0   | 0   | 0   | 0   | 2    | 23     |
| 12   | 0   | 0   | 0   | 1   | 9    | 47     |
| 116  | 5   | 0   | 1   | 0   | 23   | 2216   |
| 174  | 11  | 0   | 8   | 15  | 72   | 16862  |
| 494  | 261 | 1   | 118 | 45  | 621  | 17776  |
| 0    | 0   | 0   | 0   | 0   | 0    | 0      |
| 2711 | 356 | 108 | 167 | 170 | 3701 | 145612 |



| <i>Unicef classification</i>                  | 4          | 2            | 5          | 4                        | 3           | 3            |
|-----------------------------------------------|------------|--------------|------------|--------------------------|-------------|--------------|
| Flows of women with FGM/C Baseline hypothesis | Benin      | Burkina Faso | Cameroon   | Central African Republic | Chad        | Ivory Coast  |
| Belgium                                       | 47         | 663          | 88         | 31                       | 66          | 969          |
| Bulgaria                                      | 0          | 0            | 0          | 0                        | 0           | 0            |
| Czech Republic                                | 3          | 13           | 0          | 0                        | 7           | 22           |
| Denmark                                       | 2          | 29           | 4          | 2                        | 8           | 53           |
| Germany                                       | 65         | 932          | 154        | 19                       | 87          | 1054         |
| Estonia                                       | 0          | 0            | 0          | 0                        | 0           | 0            |
| Ireland                                       | 0          | 0            | 2          | 0                        | 3           | 18           |
| Greece                                        | 1          | 7            | 1          | 0                        | 0           | 7            |
| Spain                                         | 24         | 683          | 41         | 20                       | 31          | 666          |
| France                                        | 424        | 2236         | 399        | 1413                     | 1649        | 13340        |
| Italy                                         | 110        | 6582         | 56         | 14                       | 53          | 3850         |
| Cyprus                                        | 0          | 0            | 0          | 0                        | 0           | 0            |
| Latvia                                        | 0          | 0            | 0          | 0                        | 0           | 0            |
| Lithuania                                     | 0          | 0            | 0          | 0                        | 0           | 0            |
| Luxembourg                                    | 2          | 15           | 3          | 2                        | 2           | 44           |
| Hungary                                       | 0          | 0            | 1          | 1                        | 0           | 4            |
| Malta                                         | 0          | 0            | 0          | 0                        | 0           | 0            |
| Netherlands                                   | 8          | 157          | 11         | 2                        | 12          | 107          |
| Austria                                       | 4          | 88           | 5          | 3                        | 6           | 56           |
| Poland                                        | 0          | 0            | 0          | 0                        | 0           | 0            |
| Portugal                                      | 0          | 13           | 0          | 0                        | 9           | 0            |
| Romania                                       | 0          | 0            | 0          | 0                        | 0           | 0            |
| Slovenia                                      | 0          | 0            | 0          | 0                        | 8           | 0            |
| Slovakia                                      | 0          | 0            | 0          | 1                        | 2           | 0            |
| Finland                                       | 0          | 0            | 3          | 0                        | 0           | 13           |
| Sweden                                        | 2          | 30           | 10         | 9                        | 14          | 119          |
| United Kingdom                                | 0          | 0            | 1          | 0                        | 0           | 0            |
| Croatia                                       | 0          | 0            | 0          | 0                        | 0           | 0            |
| <b>Total</b>                                  | <b>692</b> | <b>11447</b> | <b>783</b> | <b>1517</b>              | <b>1956</b> | <b>20323</b> |

| <i>Unicef classification</i>                   | 4     | 2            | 5        | 4                        | 3    | 3           |
|------------------------------------------------|-------|--------------|----------|--------------------------|------|-------------|
| Flows of women with FGM/C Selection hypothesis | Benin | Burkina Faso | Cameroon | Central African Republic | Chad | Ivory Coast |
| Belgium                                        | 20    | 622          | 42       | 19                       | 41   | 661         |
| Bulgaria                                       | 0     | 0            | 0        | 0                        | 0    | 0           |
| Czech Republic                                 | 1     | 12           | 0        | 0                        | 4    | 15          |
| Denmark                                        | 1     | 28           | 2        | 1                        | 5    | 36          |
| Germany                                        | 28    | 874          | 73       | 12                       | 54   | 719         |
| Estonia                                        | 0     | 0            | 0        | 0                        | 0    | 0           |
| Ireland                                        | 0     | 0            | 1        | 0                        | 2    | 12          |
| Greece                                         | 0     | 6            | 1        | 0                        | 0    | 5           |
| Spain                                          | 10    | 640          | 20       | 12                       | 19   | 454         |
| France                                         | 181   | 2098         | 190      | 882                      | 1030 | 9102        |
| Italy                                          | 47    | 6175         | 27       | 9                        | 33   | 2627        |
| Cyprus                                         | 0     | 0            | 0        | 0                        | 0    | 0           |
| Latvia                                         | 0     | 0            | 0        | 0                        | 0    | 0           |
| Lithuania                                      | 0     | 0            | 0        | 0                        | 0    | 0           |
| Luxembourg                                     | 1     | 14           | 1        | 1                        | 1    | 30          |
| Hungary                                        | 0     | 0            | 0        | 1                        | 0    | 3           |
| Malta                                          | 0     | 0            | 0        | 0                        | 0    | 0           |
| Netherlands                                    | 3     | 147          | 5        | 1                        | 7    | 73          |
| Austria                                        | 2     | 82           | 3        | 2                        | 4    | 38          |
| Poland                                         | 0     | 0            | 0        | 0                        | 0    | 0           |

|                |            |              |            |            |             |              |
|----------------|------------|--------------|------------|------------|-------------|--------------|
| Portugal       | 0          | 12           | 0          | 0          | 6           | 0            |
| Romania        | 0          | 0            | 0          | 0          | 0           | 0            |
| Slovenia       | 0          | 0            | 0          | 0          | 5           | 0            |
| Slovakia       | 0          | 0            | 0          | 0          | 1           | 0            |
| Finland        | 0          | 0            | 2          | 0          | 0           | 9            |
| Sweden         | 1          | 29           | 5          | 6          | 9           | 81           |
| United Kingdom | 0          | 0            | 0          | 0          | 0           | 0            |
| Croatia        | 0          | 0            | 0          | 0          | 0           | 0            |
| <b>Total</b>   | <b>296</b> | <b>10739</b> | <b>373</b> | <b>946</b> | <b>1222</b> | <b>13866</b> |

| <i>1</i>    | <i>1</i>     | <i>1</i>     | <i>2</i>     | <i>2</i>     | <i>5</i>    | <i>1</i>     | <i>3</i>      | <i>5</i>    |
|-------------|--------------|--------------|--------------|--------------|-------------|--------------|---------------|-------------|
| Djibouti    | Egypt        | Eritrea      | Ethiopia     | Gambia       | Ghana       | Guinea       | Guinea-Bissau | Iraq        |
| 437         | 952          | 307          | 747          | 452          | 103         | 7854         | 28            | 289         |
| 0           | 0            | 0            | 0            | 0            | 0           | 0            | 0             | 0           |
| 2           | 135          | 5            | 61           | 11           | 4           | 82           | 10            | 19          |
| 3           | 165          | 137          | 313          | 194          | 30          | 33           | 14            | 206         |
| 36          | 6117         | 3465         | 4382         | 1903         | 348         | 3129         | 211           | 1875        |
| 0           | 4            | 0            | 1            | 0            | 0           | 0            | 0             | 0           |
| 0           | 217          | 36           | 80           | 0            | 8           | 52           | 0             | 23          |
| 0           | 3731         | 207          | 1528         | 18           | 8           | 10           | 5             | 65          |
| 6           | 1230         | 97           | 901          | 12939        | 464         | 11531        | 3017          | 36          |
| 243         | 3411         | 295          | 494          | 1637         | 30          | 12009        | 250           | 0           |
| 32          | 20856        | 6201         | 4477         | 484          | 628         | 1966         | 145           | 60          |
| 0           | 193          | 0            | 57           | 12           | 3           | 0            | 0             | 1           |
| 0           | 2            | 0            | 0            | 0            | 0           | 0            | 0             | 0           |
| 0           | 7            | 3            | 3            | 0            | 0           | 2            | 0             | 0           |
| 2           | 13           | 8            | 62           | 89           | 1           | 139          | 34            | 8           |
| 0           | 168          | 6            | 35           | 4            | 1           | 17           | 0             | 3           |
| 0           | 13           | 130          | 40           | 0            | 0           | 0            | 0             | 3           |
| 10          | 1197         | 259          | 1353         | 336          | 117         | 449          | 23            | 187         |
| 0           | 2092         | 67           | 604          | 1331         | 39          | 596          | 97            | 117         |
| 0           | 21           | 8            | 23           | 0            | 0           | 10           | 0             | 4           |
| 11          | 172          | 0            | 67           | 53           | 0           | 0            | 0             | 7           |
| 0           | 0            | 0            | 0            | 0            | 0           | 0            | 0             | 4           |
| 0           | 16           | 0            | 0            | 5            | 0           | 10           | 0             | 1           |
| 0           | 27           | 0            | 8            | 0            | 0           | 4            | 1             | 4           |
| 3           | 101          | 79           | 314          | 172          | 14          | 33           | 1             | 130         |
| 27          | 673          | 5592         | 2250         | 1494         | 32          | 195          | 16            | 3193        |
| 275         | 1504         | 92           | 5318         | 5773         | 963         | 0            | 0             | 31          |
| 0           | 0            | 0            | 0            | 0            | 0           | 0            | 0             | 0           |
| <b>1089</b> | <b>43016</b> | <b>16994</b> | <b>23116</b> | <b>26907</b> | <b>2794</b> | <b>38120</b> | <b>3851</b>   | <b>6266</b> |

| <i>1</i> | <i>1</i> | <i>1</i> | <i>2</i> | <i>2</i> | <i>5</i> | <i>1</i> | <i>3</i>      | <i>5</i> |
|----------|----------|----------|----------|----------|----------|----------|---------------|----------|
| Djibouti | Egypt    | Eritrea  | Ethiopia | Gambia   | Ghana    | Guinea   | Guinea-Bissau | Iraq     |
| 432      | 893      | 281      | 680      | 432      | 41       | 7615     | 20            | 229      |
| 0        | 0        | 0        | 0        | 0        | 0        | 0        | 0             | 0        |
| 2        | 126      | 5        | 55       | 11       | 1        | 79       | 7             | 15       |
| 3        | 155      | 126      | 285      | 186      | 12       | 32       | 10            | 163      |
| 36       | 5741     | 3173     | 3993     | 1821     | 137      | 3034     | 155           | 1482     |
| 0        | 4        | 0        | 1        | 0        | 0        | 0        | 0             | 0        |
| 0        | 204      | 33       | 73       | 0        | 3        | 50       | 0             | 18       |
| 0        | 3502     | 190      | 1392     | 17       | 3        | 9        | 3             | 51       |
| 6        | 1155     | 88       | 821      | 12381    | 183      | 11179    | 2211          | 29       |
| 240      | 3202     | 270      | 450      | 1566     | 12       | 11643    | 184           | 0        |
| 32       | 19573    | 5678     | 4079     | 463      | 248      | 1906     | 106           | 48       |
| 0        | 181      | 0        | 52       | 12       | 1        | 0        | 0             | 1        |
| 0        | 2        | 0        | 0        | 0        | 0        | 0        | 0             | 0        |
| 0        | 7        | 3        | 3        | 0        | 0        | 2        | 0             | 0        |
| 2        | 12       | 7        | 56       | 85       | 0        | 135      | 25            | 6        |
| 0        | 158      | 6        | 32       | 3        | 1        | 16       | 0             | 2        |
| 0        | 12       | 119      | 36       | 0        | 0        | 0        | 0             | 2        |
| 10       | 1123     | 237      | 1232     | 321      | 46       | 436      | 17            | 148      |
| 0        | 1964     | 61       | 550      | 1273     | 16       | 578      | 71            | 92       |
| 0        | 20       | 7        | 21       | 0        | 0        | 9        | 0             | 3        |

|             |              |              |              |              |             |              |             |             |
|-------------|--------------|--------------|--------------|--------------|-------------|--------------|-------------|-------------|
| 11          | 161          | 0            | 61           | 51           | 0           | 0            | 0           | 6           |
| 0           | 0            | 0            | 0            | 0            | 0           | 0            | 0           | 3           |
| 0           | 15           | 0            | 0            | 5            | 0           | 9            | 0           | 1           |
| 0           | 25           | 0            | 7            | 0            | 0           | 4            | 1           | 3           |
| 3           | 95           | 72           | 286          | 165          | 6           | 32           | 1           | 102         |
| 27          | 632          | 5121         | 2050         | 1429         | 13          | 189          | 12          | 2523        |
| 272         | 1412         | 85           | 4846         | 5524         | 380         | 0            | 0           | 24          |
| 0           | 0            | 0            | 0            | 0            | 0           | 0            | 0           | 0           |
| <b>1075</b> | <b>40371</b> | <b>15561</b> | <b>21063</b> | <b>25745</b> | <b>1103</b> | <b>36957</b> | <b>2823</b> | <b>4951</b> |

| 3           | 2           | 1            | 2           | 5          | 3            | 3            | 1            | 1            |
|-------------|-------------|--------------|-------------|------------|--------------|--------------|--------------|--------------|
| Kenya       | Liberia     | Mali         | Mauritania  | Niger      | Nigeria      | Senegal      | Sierra Leone | Somalia      |
| 199         | 129         | 614          | 419         | 26         | 984          | 710          | 430          | 1167         |
| 0           | 0           | 0            | 0           | 0          | 0            | 0            | 0            | 0            |
| 14          | 4           | 33           | 3           | 0          | 94           | 9            | 13           | 40           |
| 109         | 37          | 8            | 6           | 0          | 164          | 15           | 92           | 2826         |
| 2035        | 1964        | 546          | 230         | 10         | 4103         | 405          | 2403         | 2226         |
| 1           | 0           | 0            | 0           | 0          | 1            | 0            | 0            | 0            |
| 53          | 55          | 8            | 31          | 1          | 933          | 0            | 31           | 973          |
| 99          | 9           | 0            | 0           | 1          | 767          | 7            | 47           | 0            |
| 178         | 259         | 16603        | 4415        | 4          | 7856         | 10183        | 834          | 258          |
| 26          | 0           | 27612        | 4000        | 103        | 281          | 11147        | 573          | 0            |
| 254         | 1130        | 894          | 163         | 8          | 5902         | 11302        | 833          | 4237         |
| 7           | 0           | 0            | 0           | 0          | 12           | 2            | 0            | 0            |
| 0           | 0           | 0            | 0           | 0          | 1            | 0            | 0            | 2            |
| 0           | 0           | 0            | 1           | 0          | 7            | 0            | 0            | 30           |
| 4           | 72          | 12           | 4           | 0          | 109          | 35           | 72           | 63           |
| 15          | 0           | 3            | 1           | 0          | 240          | 3            | 4            | 0            |
| 0           | 0           | 57           | 0           | 0          | 2            | 0            | 0            | 1144         |
| 206         | 117         | 65           | 13          | 2          | 743          | 92           | 526          | 352          |
| 176         | 352         | 125          | 22          | 1          | 2519         | 92           | 858          | 1372         |
| 12          | 0           | 0            | 0           | 0          | 10           | 2            | 0            | 23           |
| 22          | 0           | 0            | 0           | 0          | 30           | 0            | 13           | 0            |
| 0           | 0           | 0            | 0           | 0          | 0            | 0            | 0            | 0            |
| 3           | 1           | 3            | 0           | 0          | 10           | 0            | 0            | 5            |
| 4           | 0           | 2            | 0           | 0          | 8            | 3            | 0            | 16           |
| 117         | 29          | 0            | 0           | 0          | 141          | 14           | 57           | 4540         |
| 179         | 192         | 76           | 12          | 0          | 504          | 58           | 388          | 32083        |
| 3645        | 56          | 0            | 143         | 0          | 14716        | 117          | 6224         | 8860         |
| 0           | 0           | 0            | 0           | 0          | 0            | 0            | 0            | 0            |
| <b>7359</b> | <b>4408</b> | <b>46658</b> | <b>9464</b> | <b>156</b> | <b>40139</b> | <b>34197</b> | <b>13399</b> | <b>60217</b> |

| 3     | 2       | 1     | 2          | 5     | 3       | 3       | 1            | 1       |
|-------|---------|-------|------------|-------|---------|---------|--------------|---------|
| Kenya | Liberia | Mali  | Mauritania | Niger | Nigeria | Senegal | Sierra Leone | Somalia |
| 120   | 87      | 617   | 313        | 14    | 1223    | 578     | 376          | 1151    |
| 0     | 0       | 0     | 0          | 0     | 0       | 0       | 0            | 0       |
| 8     | 3       | 33    | 3          | 0     | 117     | 7       | 12           | 39      |
| 66    | 25      | 8     | 5          | 0     | 204     | 12      | 80           | 2787    |
| 1228  | 1332    | 549   | 172        | 5     | 5095    | 329     | 2100         | 2195    |
| 1     | 0       | 0     | 0          | 0     | 2       | 0       | 0            | 0       |
| 32    | 37      | 8     | 23         | 0     | 1158    | 0       | 27           | 959     |
| 60    | 6       | 0     | 0          | 0     | 953     | 6       | 41           | 0       |
| 107   | 176     | 16678 | 3302       | 2     | 9757    | 8287    | 729          | 254     |
| 16    | 0       | 27737 | 2992       | 56    | 349     | 9071    | 501          | 0       |
| 153   | 766     | 898   | 122        | 5     | 7329    | 9197    | 728          | 4178    |
| 5     | 0       | 0     | 0          | 0     | 15      | 1       | 0            | 0       |
| 0     | 0       | 0     | 0          | 0     | 1       | 0       | 0            | 2       |
| 0     | 0       | 0     | 1          | 0     | 9       | 0       | 0            | 30      |
| 2     | 49      | 13    | 3          | 0     | 135     | 29      | 63           | 62      |
| 9     | 0       | 3     | 1          | 0     | 298     | 2       | 4            | 0       |
| 0     | 0       | 57    | 0          | 0     | 3       | 0       | 0            | 1128    |
| 124   | 80      | 65    | 10         | 1     | 923     | 75      | 459          | 348     |
| 106   | 239     | 125   | 17         | 1     | 3128    | 75      | 750          | 1353    |
| 7     | 0       | 0     | 0          | 0     | 13      | 2       | 0            | 23      |

|             |             |              |             |           |              |              |              |              |
|-------------|-------------|--------------|-------------|-----------|--------------|--------------|--------------|--------------|
| 13          | 0           | 0            | 0           | 0         | 38           | 0            | 11           | 0            |
| 0           | 0           | 0            | 0           | 0         | 0            | 0            | 0            | 0            |
| 2           | 1           | 3            | 0           | 0         | 13           | 0            | 0            | 5            |
| 2           | 0           | 2            | 0           | 0         | 10           | 2            | 0            | 15           |
| 71          | 20          | 0            | 0           | 0         | 175          | 11           | 50           | 4477         |
| 108         | 130         | 76           | 9           | 0         | 626          | 47           | 339          | 31636        |
| 2198        | 38          | 0            | 107         | 0         | 18276        | 95           | 5439         | 8737         |
| 0           | 0           | 0            | 0           | 0         | 0            | 0            | 0            | 0            |
| <b>4439</b> | <b>2989</b> | <b>46870</b> | <b>7077</b> | <b>86</b> | <b>49850</b> | <b>27828</b> | <b>11709</b> | <b>59376</b> |

| 1     | 4                                  | 5    | 5      | 4     | 2         |        |
|-------|------------------------------------|------|--------|-------|-----------|--------|
| Sudan | Tanzania,<br>United<br>Republic of | Togo | Uganda | Yemen | Indonesia | Total  |
| 494   | 94                                 | 88   | 10     | 11    | 711       | 19119  |
| 0     | 0                                  | 0    | 0      | 0     | 0         | 0      |
| 31    | 5                                  | 0    | 1      | 26    | 76        | 721    |
| 303   | 47                                 | 2    | 11     | 2     | 230       | 5048   |
| 2145  | 195                                | 345  | 28     | 290   | 3962      | 44664  |
| 0     | 0                                  | 0    | 0      | 0     | 1         | 8      |
| 404   | 7                                  | 1    | 3      | 10    | 26        | 2974   |
| 120   | 16                                 | 0    | 3      | 0     | 212       | 6868   |
| 204   | 33                                 | 20   | 2      | 5     | 279       | 72817  |
| 800   | 0                                  | 272  | 0      | 0     | 802       | 83445  |
| 673   | 85                                 | 110  | 6      | 33    | 551       | 71695  |
| 5     | 0                                  | 0    | 0      | 0     | 46        | 338    |
| 0     | 0                                  | 0    | 0      | 0     | 1         | 6      |
| 2     | 0                                  | 0    | 0      | 0     | 0         | 57     |
| 18    | 1                                  | 5    | 0      | 0     | 15        | 834    |
| 27    | 2                                  | 0    | 0      | 14    | 52        | 602    |
| 0     | 0                                  | 0    | 0      | 0     | 0         | 1389   |
| 392   | 127                                | 13   | 19     | 14    | 3078      | 9987   |
| 363   | 18                                 | 6    | 8      | 5     | 306       | 11327  |
| 0     | 4                                  | 0    | 0      | 6     | 22        | 145    |
| 0     | 0                                  | 0    | 0      | 7     | 117       | 522    |
| 0     | 0                                  | 0    | 0      | 0     | 0         | 4      |
| 1     | 0                                  | 0    | 0      | 0     | 8         | 72     |
| 37    | 1                                  | 0    | 0      | 3     | 30        | 151    |
| 361   | 37                                 | 1    | 2      | 2     | 80        | 6244   |
| 544   | 85                                 | 3    | 19     | 60    | 255       | 48115  |
| 1541  | 2058                               | 5    | 274    | 175   | 2188      | 53960  |
| 0     | 0                                  | 0    | 0      | 0     | 0         | 0      |
| 8466  | 2812                               | 872  | 386    | 663   | 13046     | 441112 |

| 1     | 4                                  | 5    | 5      | 4     | 2         |       |
|-------|------------------------------------|------|--------|-------|-----------|-------|
| Sudan | Tanzania,<br>United<br>Republic of | Togo | Uganda | Yemen | Indonesia | Total |
| 455   | 37                                 | 36   | 10     | 9     | 716       | 17770 |
| 0     | 0                                  | 0    | 0      | 0     | 0         | 0     |
| 28    | 2                                  | 0    | 1      | 20    | 76        | 683   |
| 279   | 18                                 | 1    | 12     | 2     | 232       | 4775  |
| 1976  | 76                                 | 142  | 30     | 224   | 3988      | 40773 |
| 0     | 0                                  | 0    | 0      | 0     | 1         | 8     |
| 372   | 3                                  | 0    | 3      | 8     | 27        | 3054  |
| 110   | 6                                  | 0    | 3      | 0     | 213       | 6579  |
| 188   | 13                                 | 8    | 2      | 4     | 281       | 68996 |
| 737   | 0                                  | 112  | 0      | 0     | 807       | 73425 |
| 620   | 33                                 | 45   | 7      | 26    | 555       | 65712 |
| 5     | 0                                  | 0    | 0      | 0     | 46        | 318   |
| 0     | 0                                  | 0    | 0      | 0     | 1         | 6     |
| 2     | 0                                  | 0    | 0      | 0     | 0         | 56    |
| 17    | 0                                  | 2    | 0      | 0     | 15        | 768   |
| 25    | 1                                  | 0    | 0      | 11    | 52        | 628   |
| 0     | 0                                  | 0    | 0      | 0     | 0         | 1358  |
| 361   | 50                                 | 6    | 20     | 11    | 3098      | 9438  |
| 335   | 7                                  | 2    | 8      | 4     | 308       | 11192 |
| 0     | 1                                  | 0    | 0      | 4     | 22        | 133   |

|      |      |     |     |     |       |        |
|------|------|-----|-----|-----|-------|--------|
| 0    | 0    | 0   | 0   | 6   | 117   | 493    |
| 0    | 0    | 0   | 0   | 0   | 0     | 3      |
| 1    | 0    | 0   | 0   | 0   | 8     | 67     |
| 35   | 0    | 0   | 0   | 2   | 30    | 142    |
| 333  | 14   | 0   | 2   | 1   | 81    | 6007   |
| 501  | 34   | 1   | 20  | 46  | 256   | 45954  |
| 1420 | 808  | 2   | 287 | 136 | 2202  | 52287  |
| 0    | 0    | 0   | 0   | 0   | 0     | 0      |
| 7798 | 1104 | 359 | 404 | 514 | 13131 | 410625 |
